# Supplementary material for: A Study of the Micellar Formation of N-Alkyl Betaine Ethyl Ester Chlorides Based on the Physicochemical Properties of Their Aqueous Solutions
Source: MDPI journal article supplement (doi:10.3390/molecules29081844), 2024-04-18
Supplement: s1 [file s1]

## **A study of the micellar formation of *N*-alkyl betaine ethyl ester chlorides based on physicochemical properties of their aqueous solutions**

Monika Geppert-Rybczyńska <sup>1\*</sup>, Anna Mrozek- Wilczkiewicz <sup>2,3</sup>, Patrycja Rawicka <sup>2</sup> and Piotr Bartczak <sup>4</sup>

<sup>1</sup> *Institute of Chemistry, University of Silesia, Szkolna 9, 40-006 Katowice, Poland*

<sup>2</sup> *August Chelkowski Institute of Physics, University of Silesia, 75 Pułku Piechoty 1, 41-500 Chorzów, Poland*

<sup>3</sup> *Department of Systems Biology and Engineering, Silesian University of Technology, Akademicka 16, 44-100 Gliwice, Poland*

<sup>4</sup> *Centre for Materials and Drug Discovery, Institute of Chemistry, University of Silesia, Szkolna 9, 40-006 Katowice, Poland*

### ***Table of contents***

**Figures S1-S4:** <sup>1</sup>H NMR spectra of **dimethyl alkyl amines** pages S3-S4

**Figures S5-S10:** <sup>1</sup>H NMR and <sup>13</sup>C NMR spectra of ***N*-alkylbetaine ethyl ester chlorides** pages S5-S9

**Figures S11-S14:** FTIR spectra of ***N*-alkylbetaine ethyl ester chlorides** pages S10-S11

**Figures S15- S18:** LR-MS spectra of ***N*-alkylbetaine ethyl ester chlorides** pages S12-S13

**Figure 19:** DSC of the ***N*-alkylbetaine ethyl ester chlorides**, C<sub>*n*</sub>BetC<sub>2</sub>Cl page S14

**Figure 20:** TGA diagrams for the ***N*-alkylbetaine ethyl ester chlorides**, C<sub>*n*</sub>BetC<sub>2</sub>Cl page S14

**Table S1:** Characteristics of materials used for the synthesis of alkylbetaine esters in this study page S15

**Table S2:** Density, speed of sound, surface tension and dynamic viscosity of aqueous solutions of ***N*-alkylbetaine ethyl esters chlorides**, C<sub>*n*</sub>BetC<sub>2</sub>Cl (for *n* = 6, 8, 10 and 12) at 298.15 K, and for C<sub>12</sub>BetC<sub>2</sub>Cl at temperatures *t* = (15 – 45) °C, with a step of 10 °C

pages S15-S18

**Table S3:** Coefficients of equations:  $y = \sum_{i=0}^{n=2} y_i \cdot m^i$  describing concentration dependence of density,  $\rho$ , and speed of sound,  $c$ , and:  $\gamma = a + b \cdot \log m$  for surface tension,  $\gamma$ , of aqueous solutions of *N*-alkyl betaine ethyl esters chlorides,  $C_n\text{BetC}_2\text{Cl}$  (for  $n = 6, 8, 10, 12$  (1)) at 25 °C, and for  $C_{12}\text{BetC}_2\text{Cl}$  at temperatures  $t = (15 - 45)$  °C, with a step of 10 K, together with the mean deviations from the regression line:  $\delta\rho$ ,  $\delta c$ ,  $\delta\gamma$  and CMC (if attainable) calculated based on the intersection of the curves before and after CMC; for density and speed of sound there is one equation for  $C_6\text{BetC}_2\text{Cl}$  and  $C_8\text{BetC}_2\text{Cl}$ , and two independent equations were found, before and after CMC for  $C_{10}\text{BetC}_2\text{Cl}$  and  $C_{12}\text{BetC}_2\text{Cl}$ .

pages S18-S21

**Table S4:** Apparent molar volume,  $V_\phi$ , adiabatic compressibility,  $\kappa_s$ , and apparent molar compressibility,  $K_{S\phi}$  of *N*-alkyl betaine ethyl esters chlorides,  $C_n\text{BetC}_2\text{Cl}$  (for  $n = 6, 8, 10, 12$  (1)) in aqueous solutions at 25 °C, and for  $C_{12}\text{BetC}_2\text{Cl}$  at temperatures  $t = (15 - 45)$  °C with a step of 10 °C

pages S22-S24

**Figure S21:** Density of aqueous solutions of  $C_{12}\text{BetC}_2\text{Cl}$

page S25

**Figure S22:** Speed of sound in aqueous solutions of  $C_{12}\text{BetC}_2\text{Cl}$

page S25

**Figure S23:** Comparison of density of aqueous solutions of  $C_{10}\text{BetC}_2\text{Cl}$  at 25 °C

page S26

**Figure S24:** Surface tension of aqueous solutions of  $C_{12}\text{BetC}_2\text{Cl}$

page S26

**Figure S25:** Apparent molar volume of  $C_{12}\text{BetC}_2\text{Cl}$  aqueous solutions

page S27

**Figure S26:** Apparent molar compressibility of  $C_{12}\text{BetC}_2\text{Cl}$  aqueous solutions

page S27

**Figure S27:** Reduced viscosity of aqueous solutions of  $C_{12}\text{BetC}_2\text{Cl}$

page S28

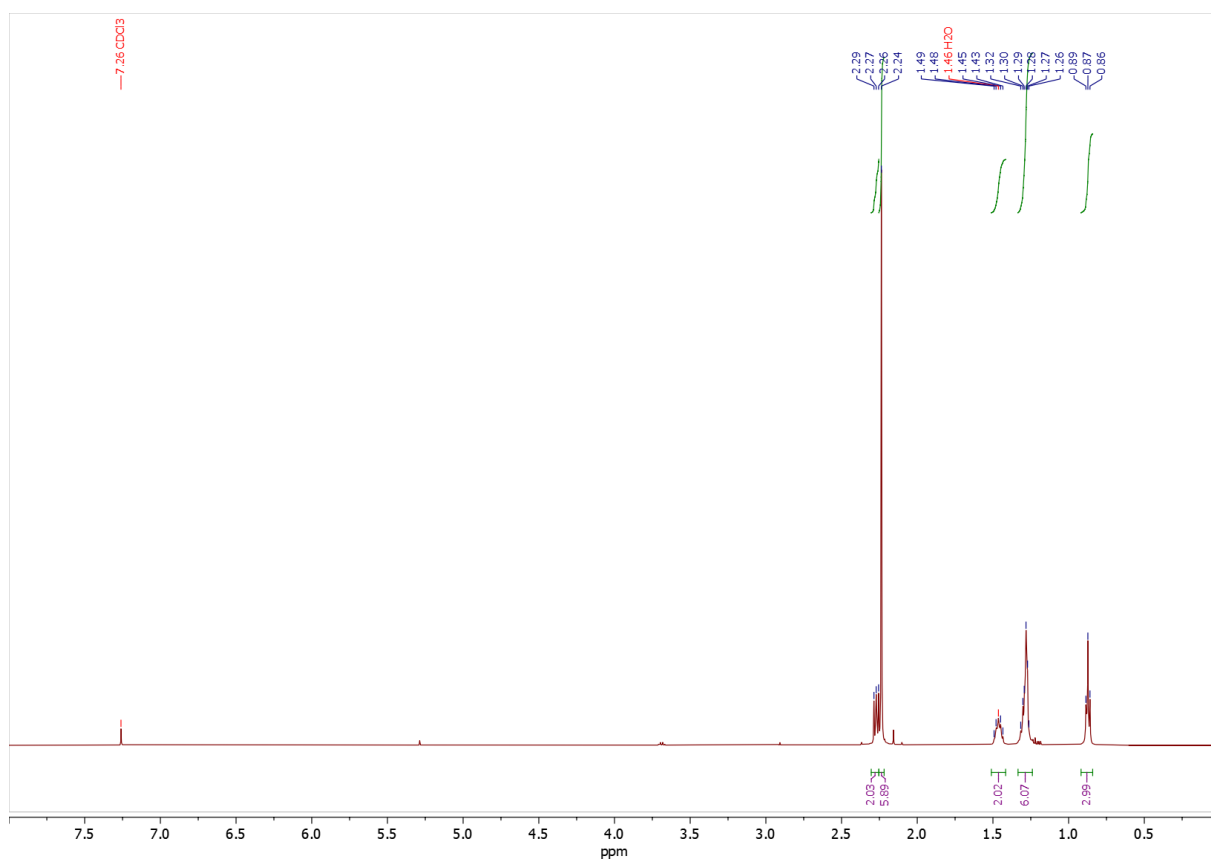

**Figure S1.** <sup>1</sup>H NMR spectra of *N,N*-dimethylhexan-1-amine

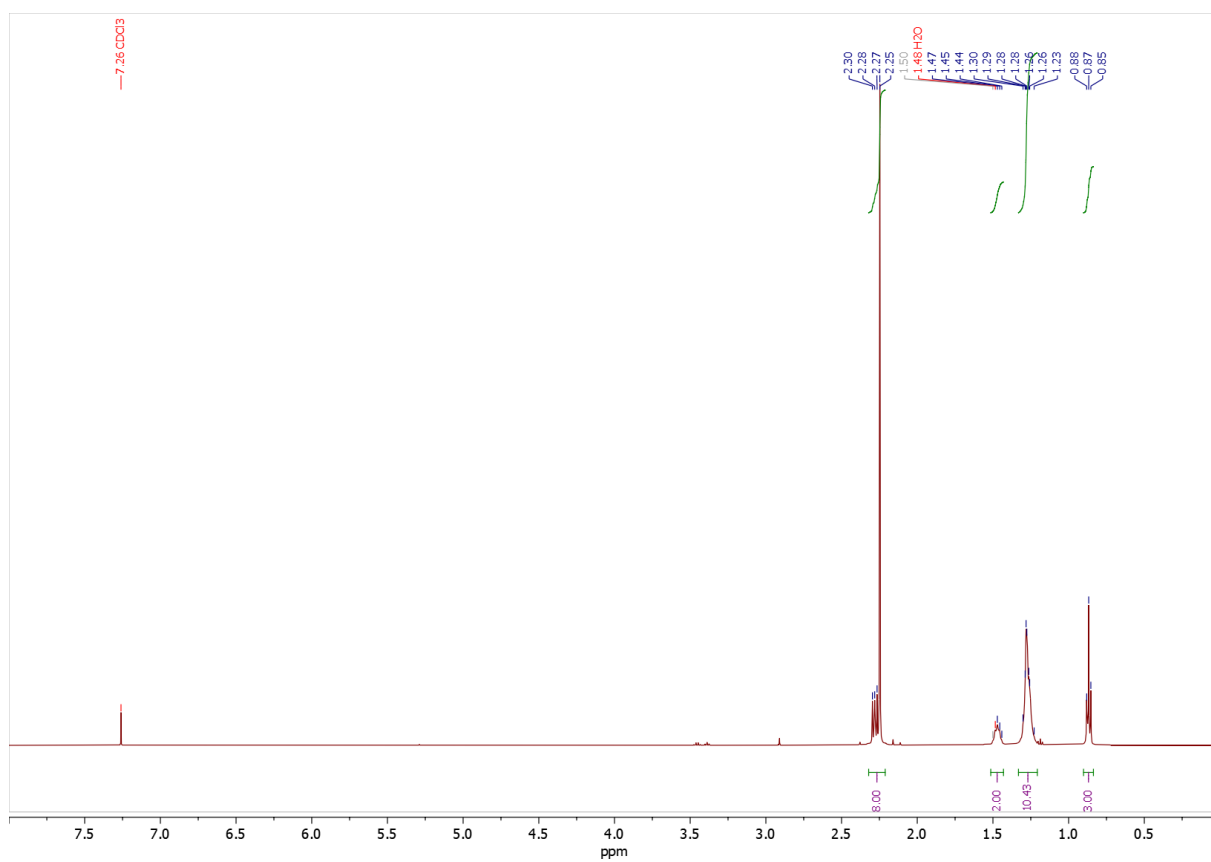

**Figure S2.** <sup>1</sup>H NMR spectra of *N,N*-dimethyloctan-1-amine

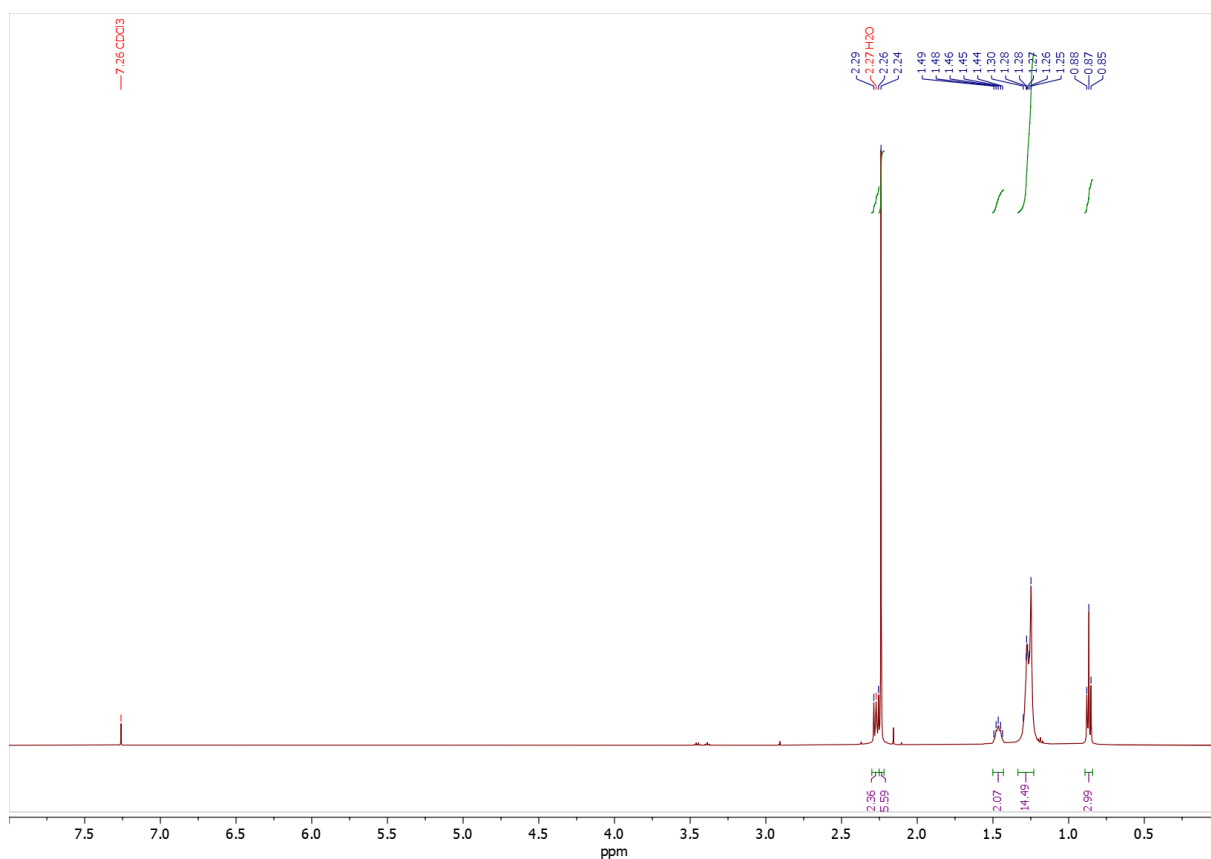

**Figure S3.** <sup>1</sup>H NMR spectra of *N,N*-dimethyldecan-1-amine

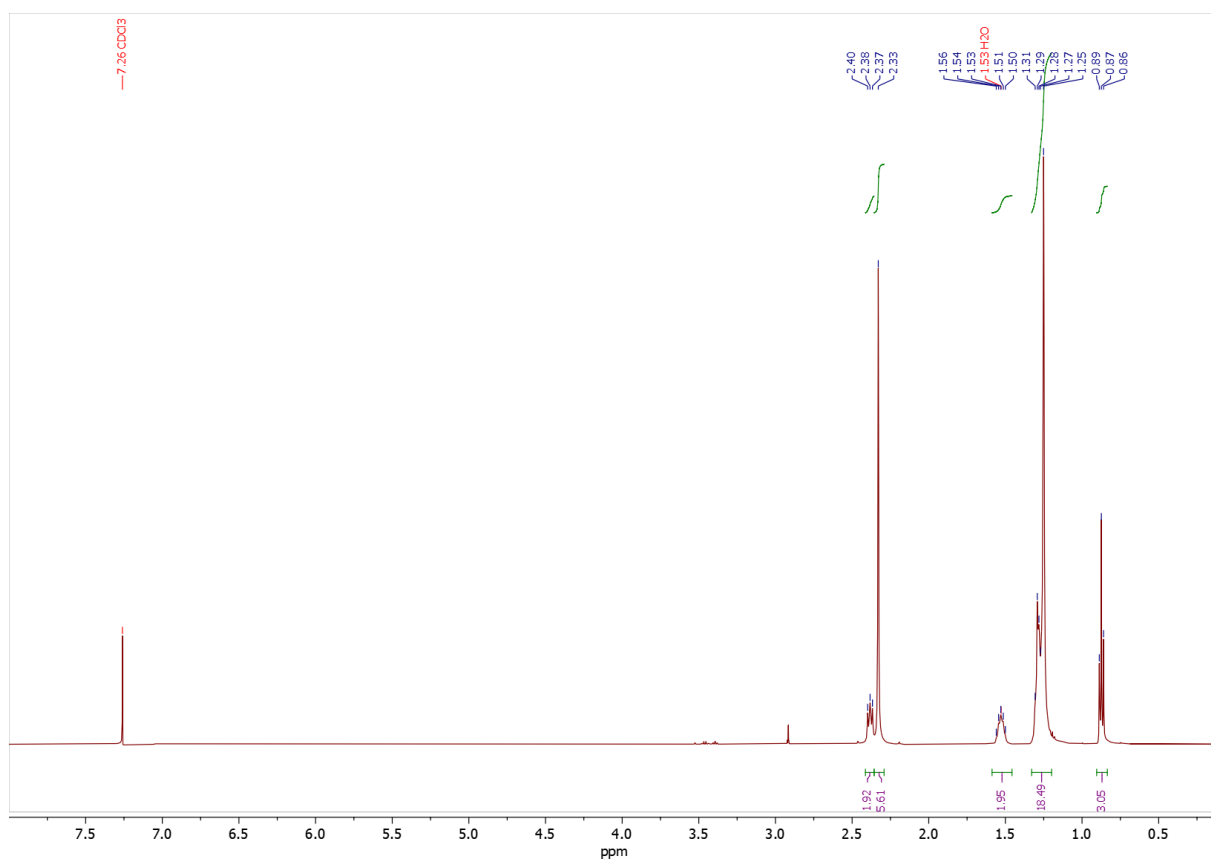

**Figure S4.** <sup>1</sup>H NMR spectra of *N,N*-dimethyldodecan-1-amine

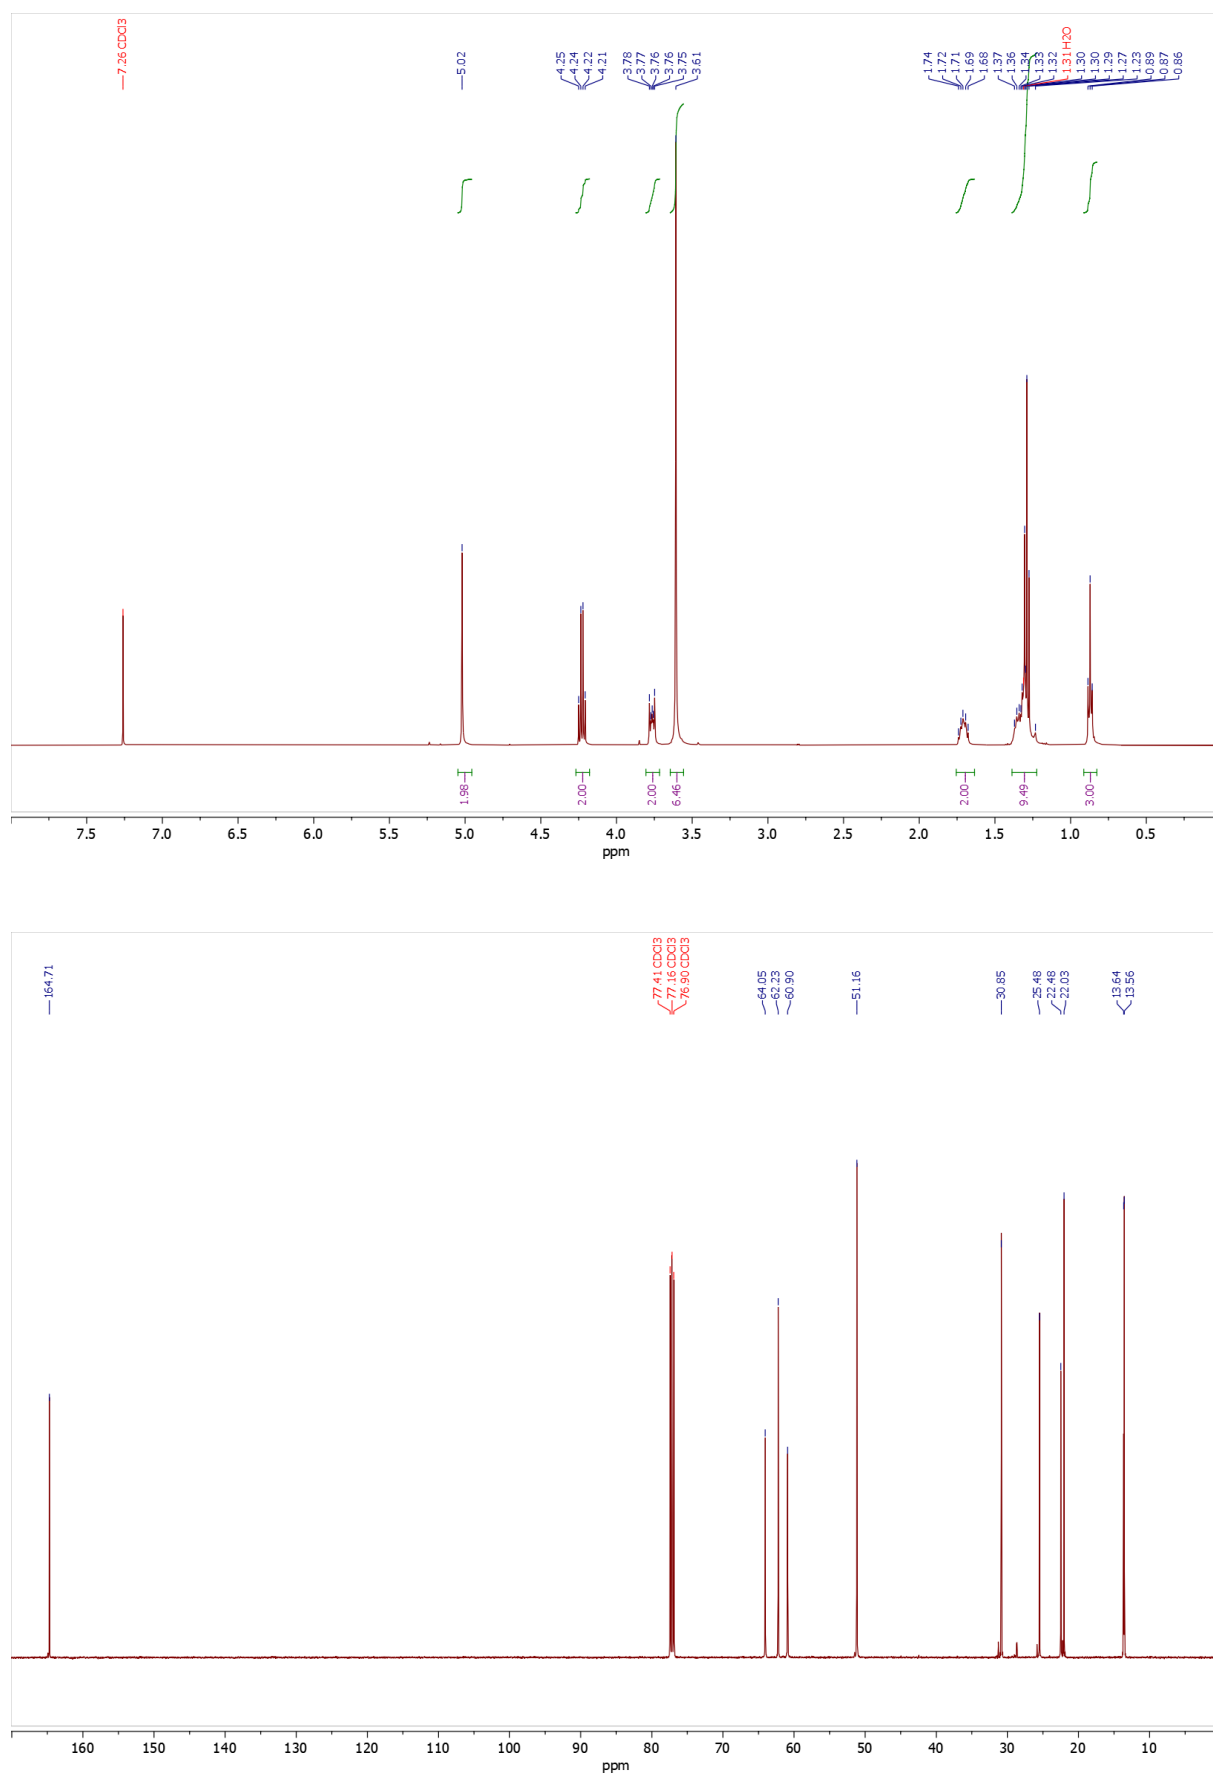

**Figure S5.** <sup>1</sup>H NMR and <sup>13</sup>C NMR spectra of **C<sub>6</sub>BetC<sub>2</sub>Cl**

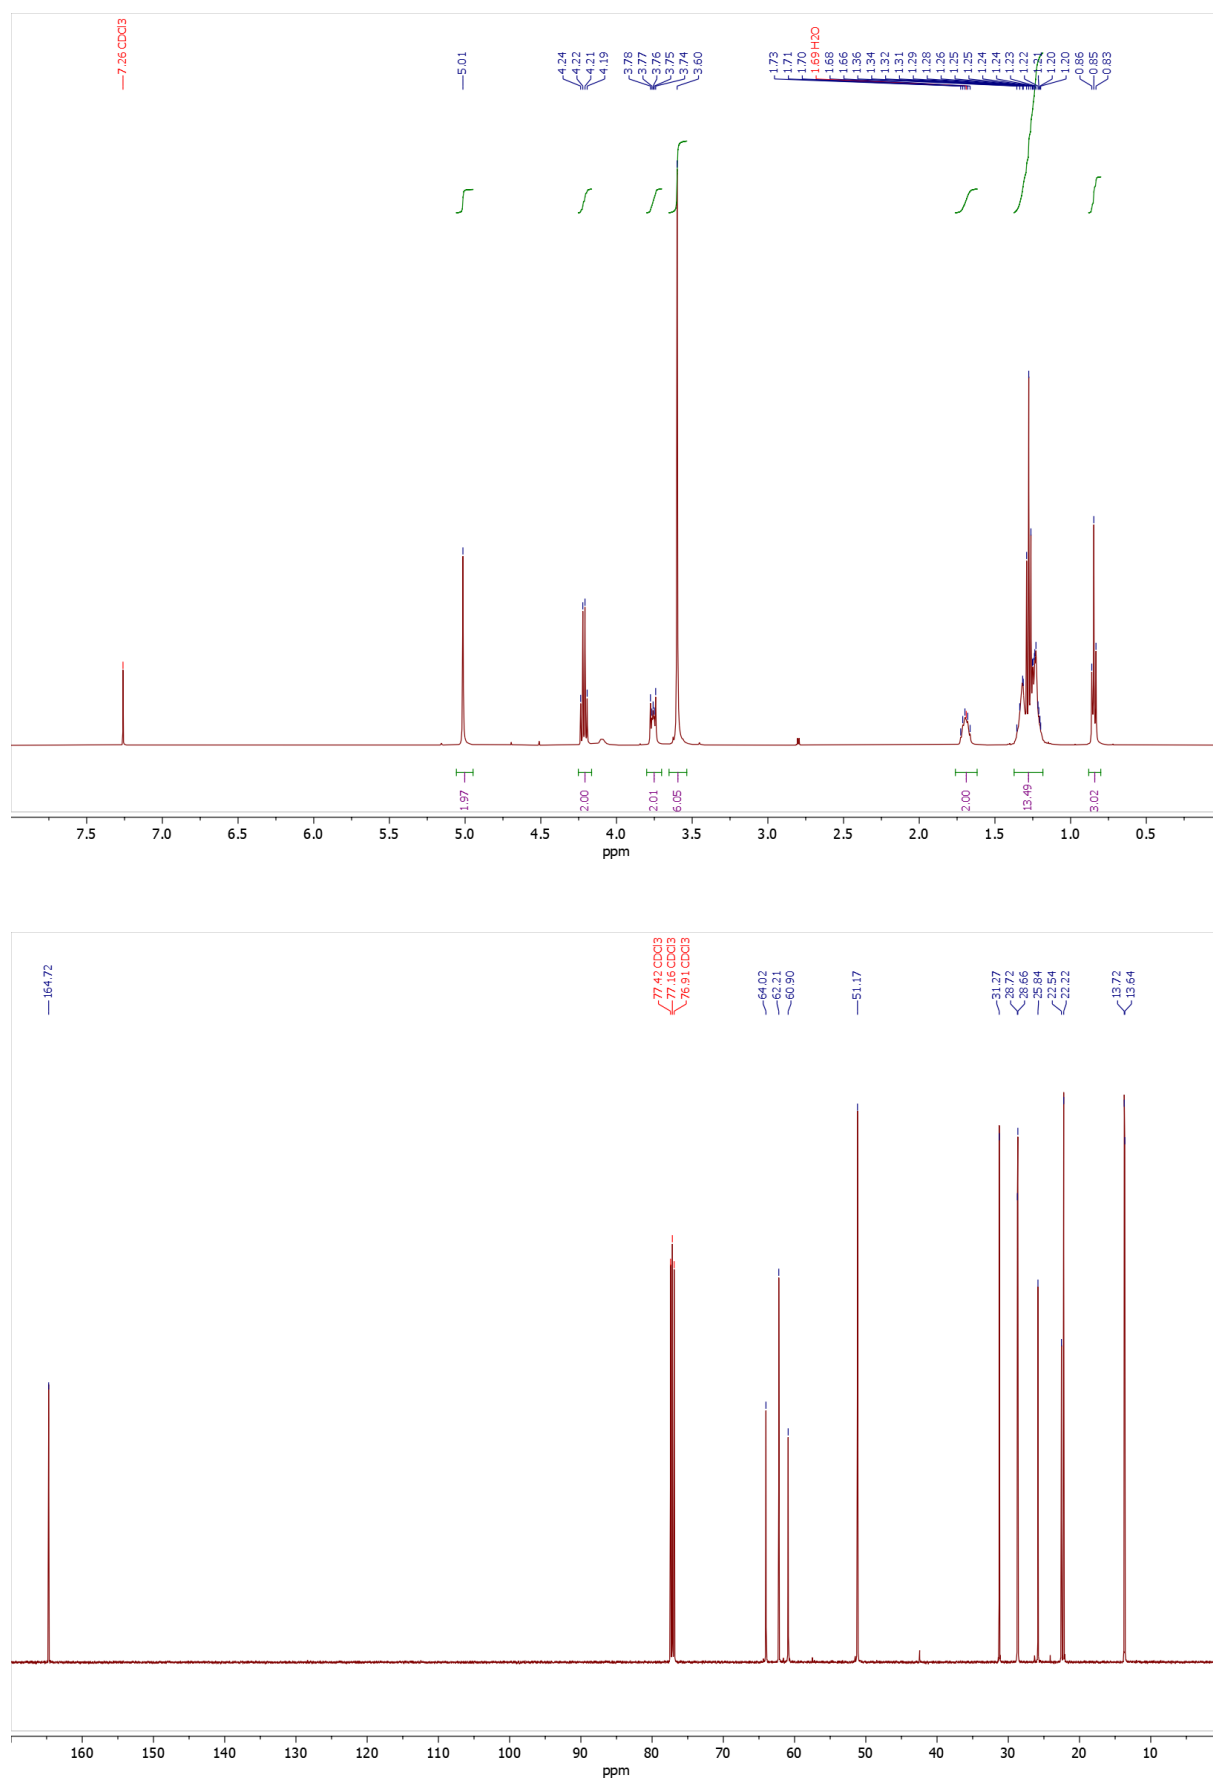

**Figure S6.**  $^1\text{H}$  NMR and  $^{13}\text{C}$  NMR spectra of **C<sub>8</sub>BetC<sub>2</sub>Cl**

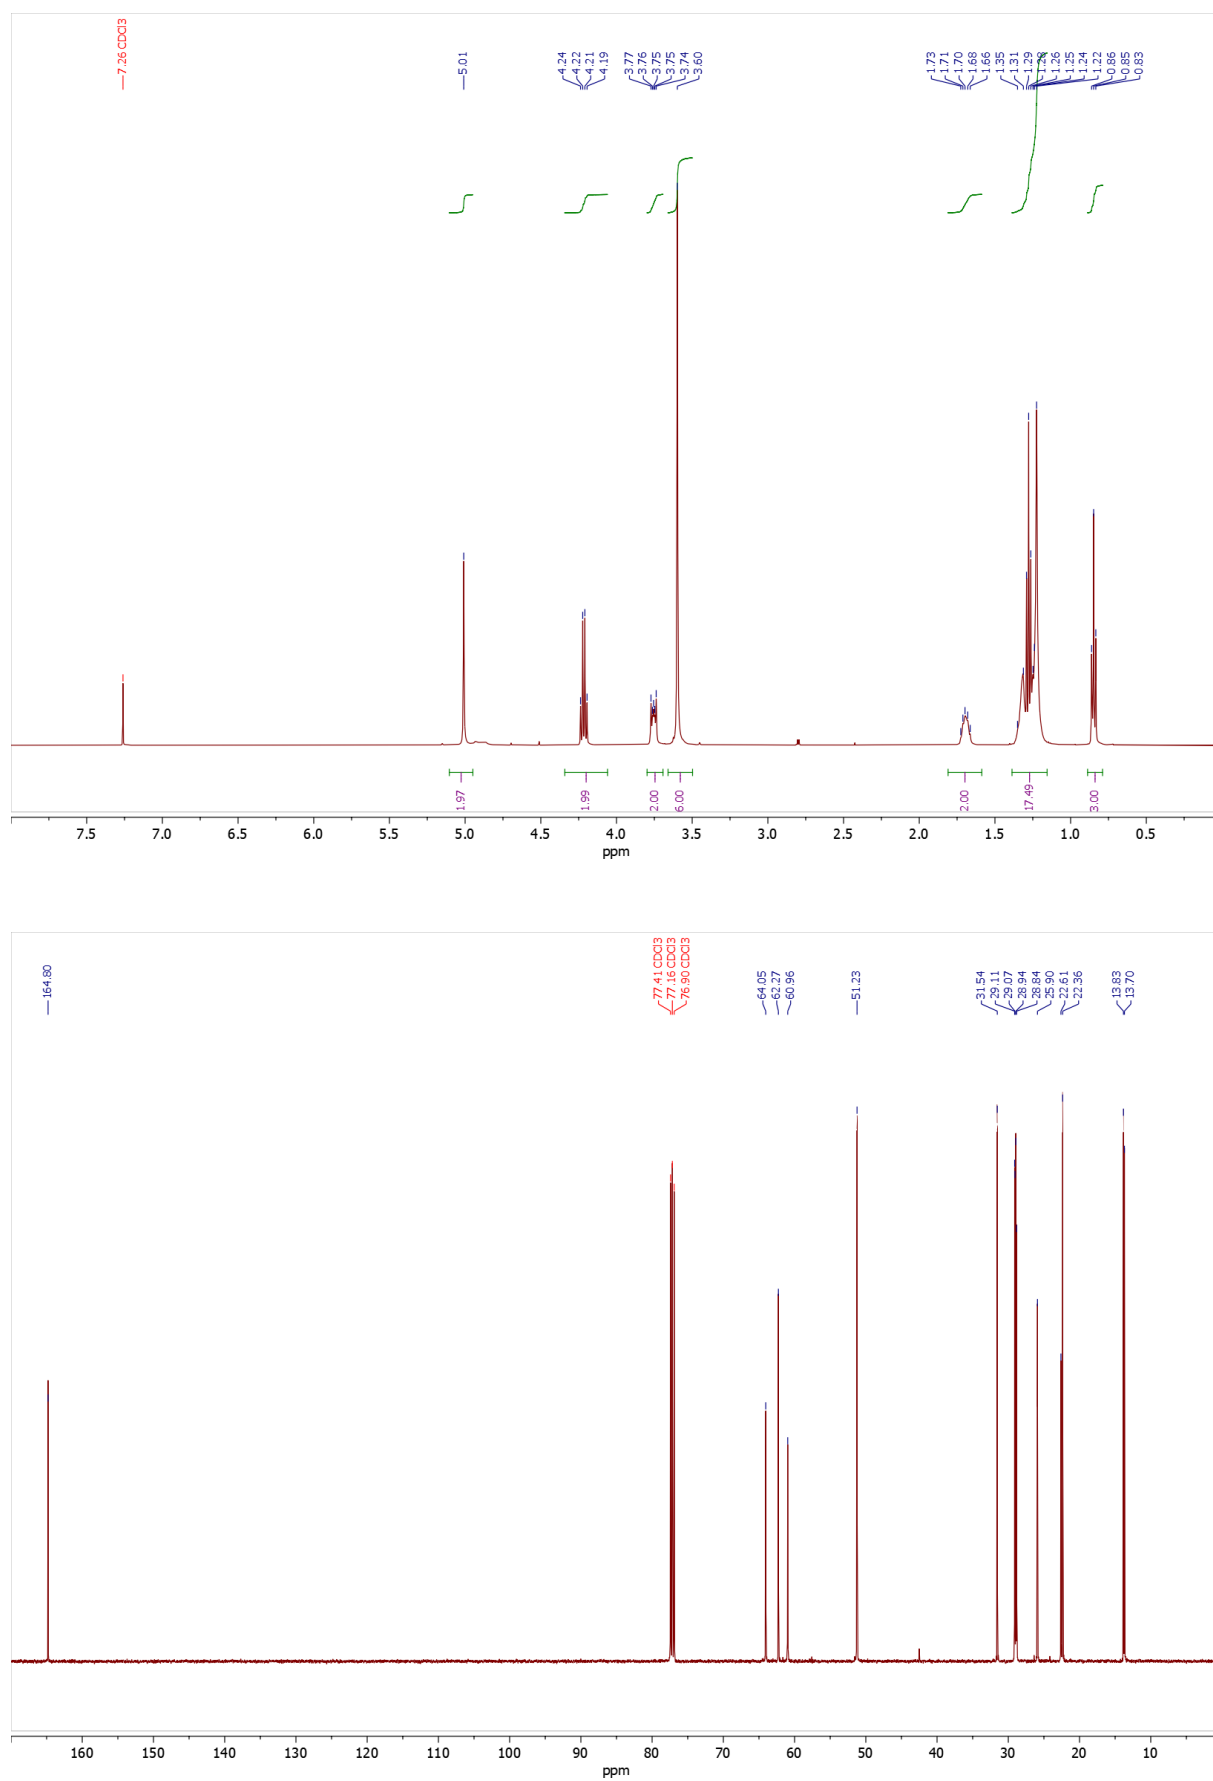

**Figure S7.**  $^1\text{H}$  NMR and  $^{13}\text{C}$  NMR spectra of **C<sub>10</sub>BetC<sub>2</sub>Cl**

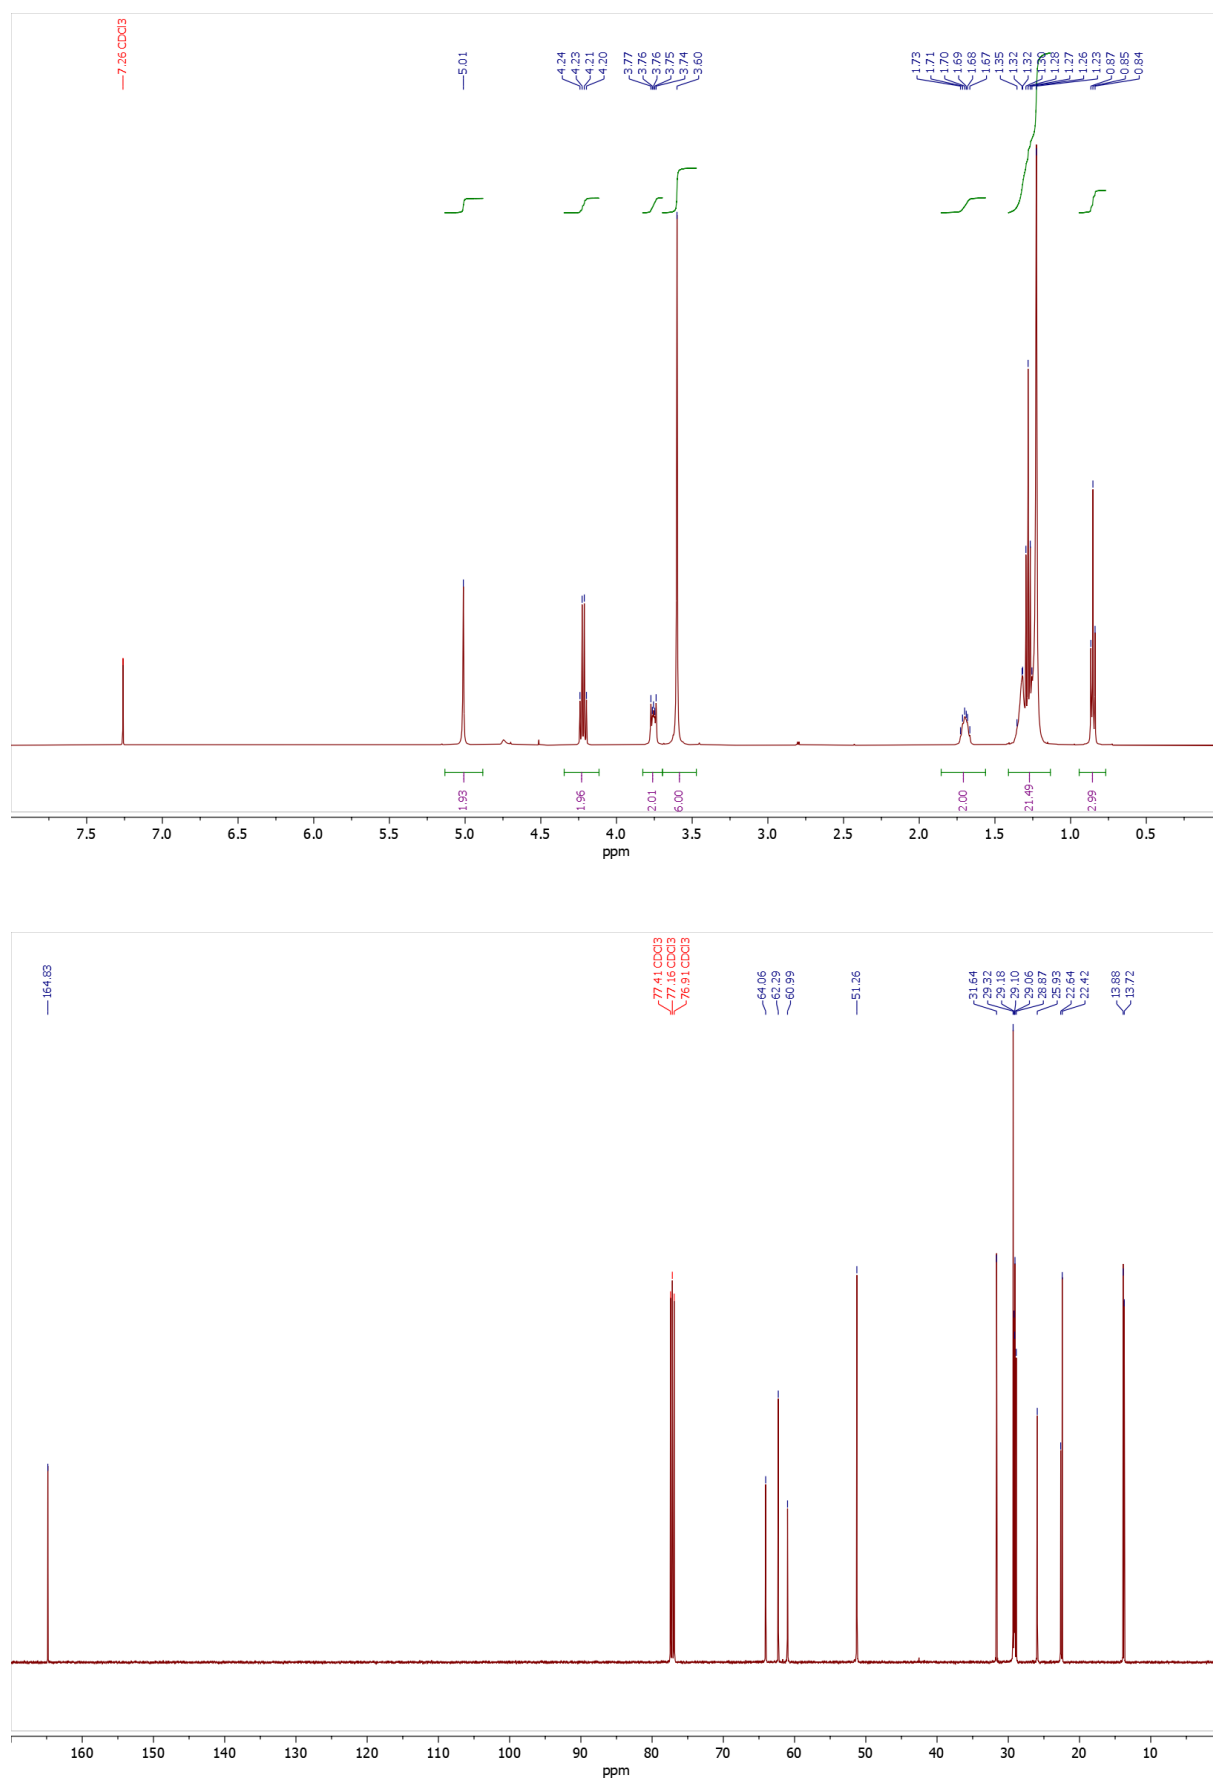

**Figure S8.** <sup>1</sup>H NMR and <sup>13</sup>C NMR spectra of **C<sub>12</sub>BetC<sub>2</sub>Cl**



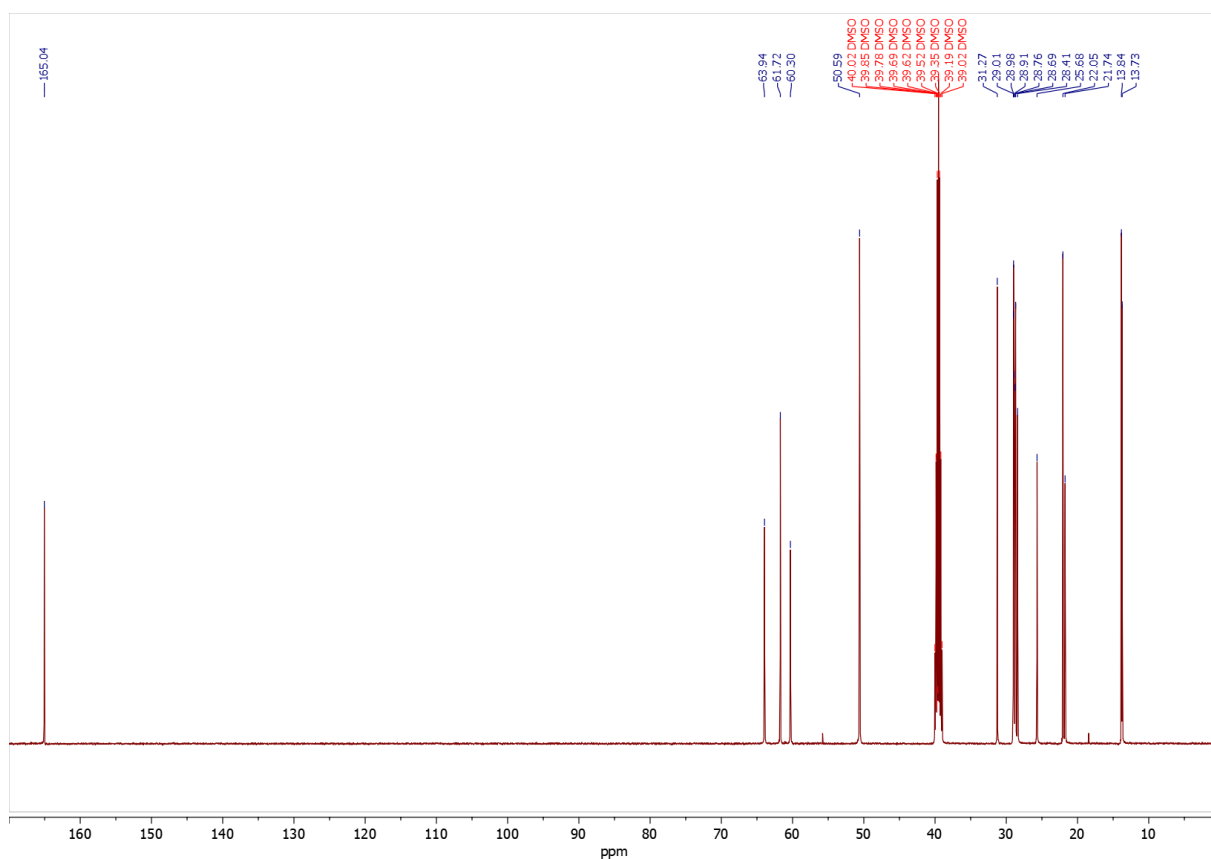

**Figure S9.**  $^{13}\text{C}$  NMR spectra of **C<sub>12</sub>BetC<sub>2</sub>Cl** in DMSO-D<sub>6</sub>

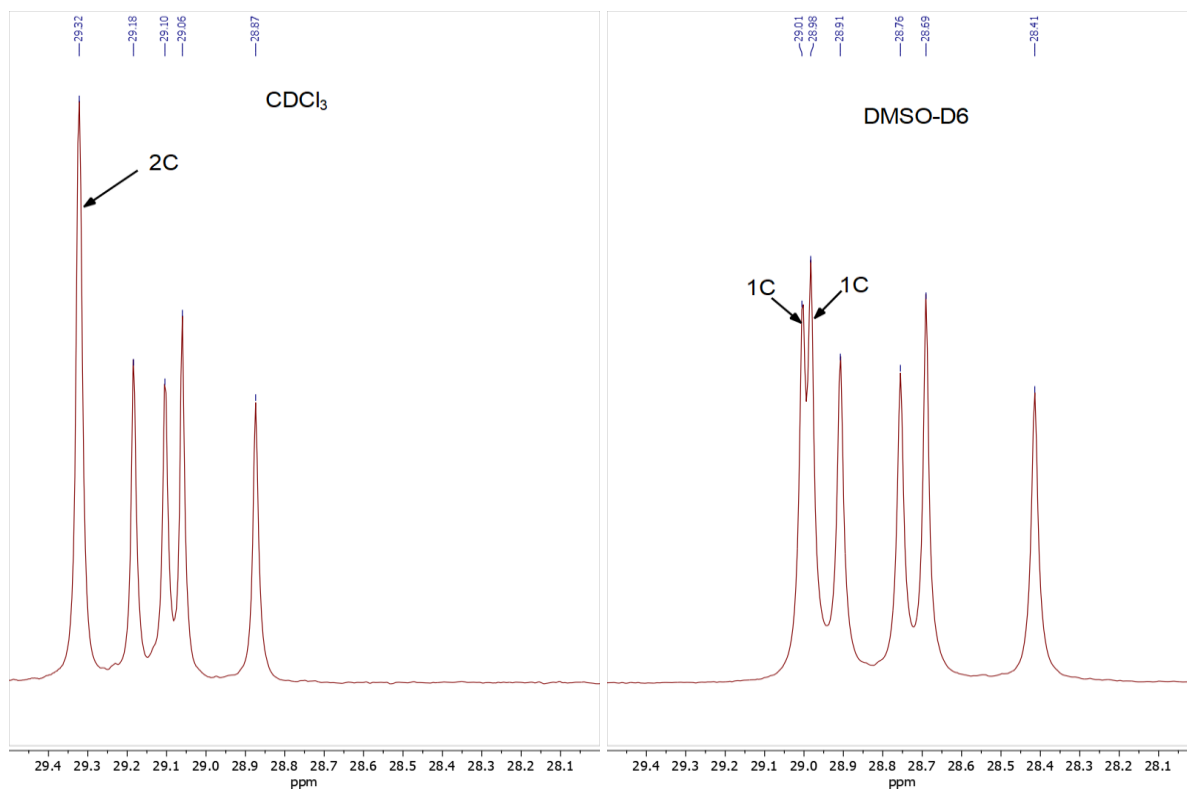

**Figure S10.** Comparison of  $^{13}\text{C}$  NMR spectra of **C<sub>12</sub>BetC<sub>2</sub>Cl** in  $\text{CDCl}_3$  and DMSO-D<sub>6</sub>

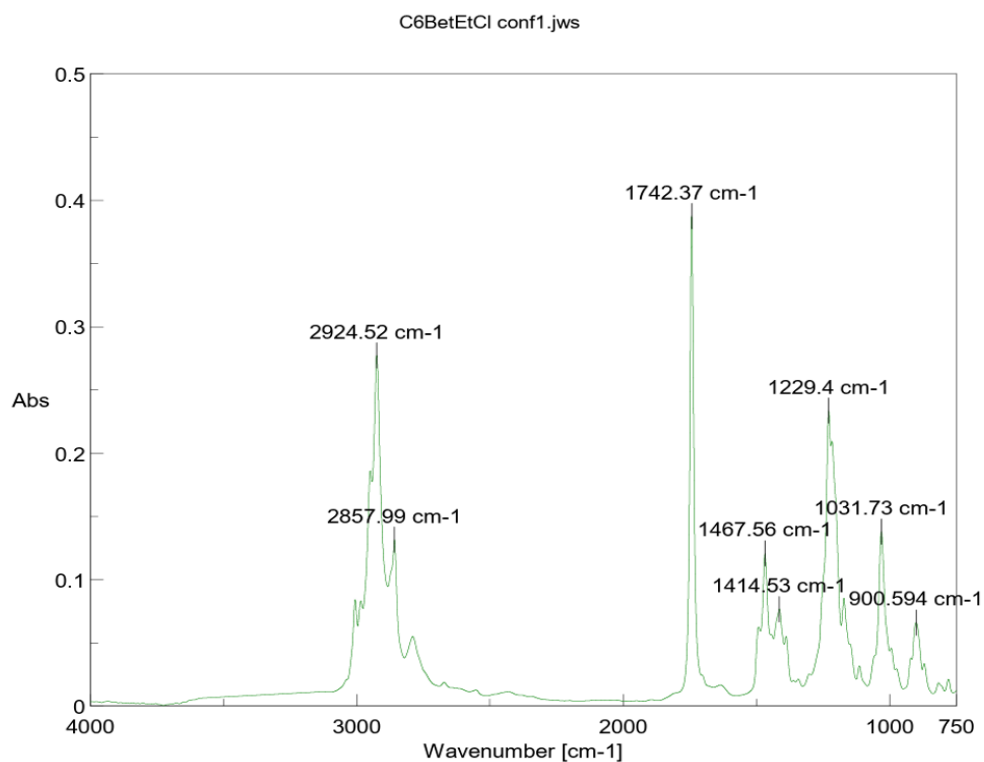

**Figure S11.** FTIR (ATR) spectra of **C<sub>6</sub>BetC<sub>2</sub>Cl**

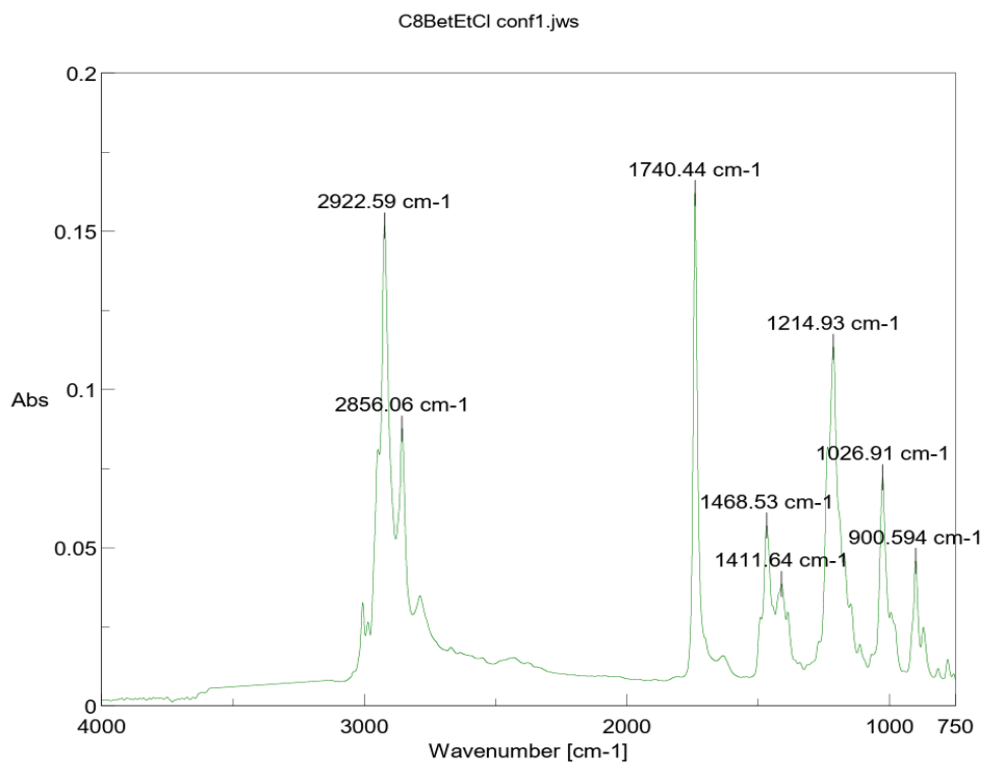

**Figure S12.** FTIR (ATR) spectra of **C<sub>8</sub>BetC<sub>2</sub>Cl**

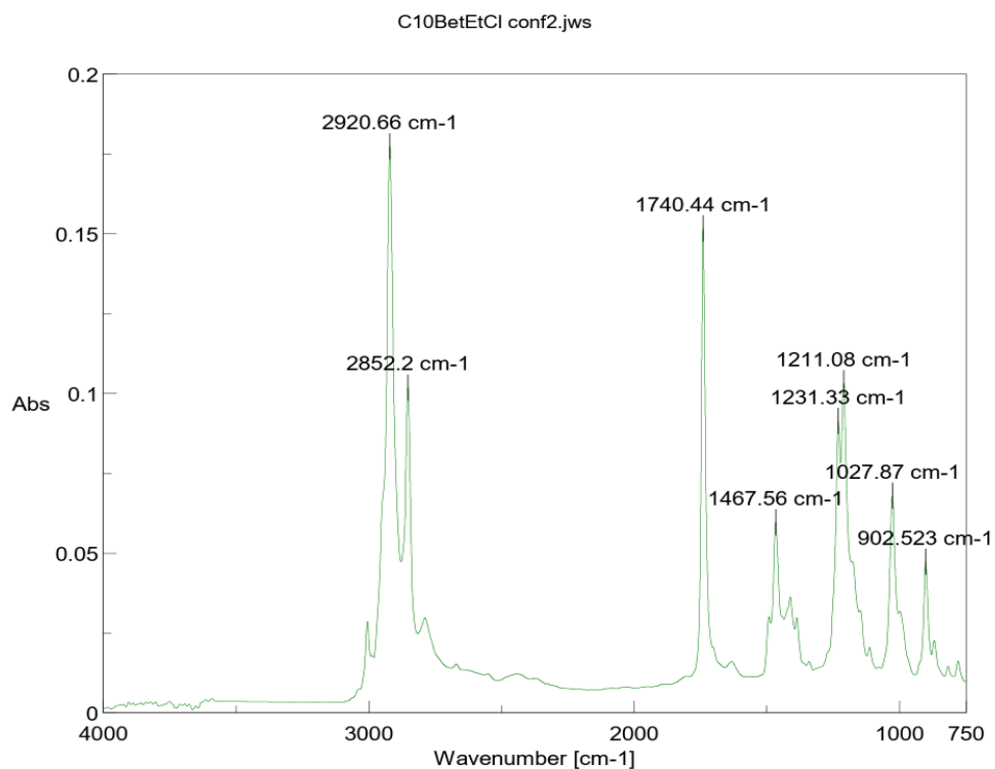

**Figure S13.** FTIR (ATR) spectra of **C<sub>10</sub>BetC<sub>2</sub>Cl**

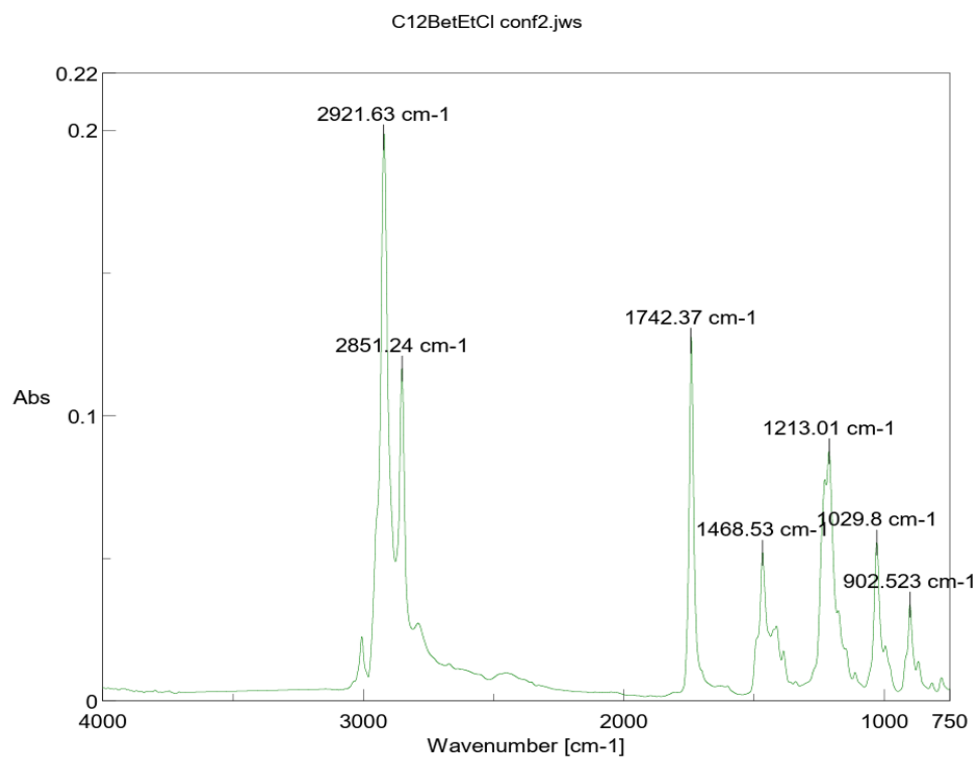

**Figure S14.** FTIR (ATR) spectra of **C<sub>12</sub>BetC<sub>2</sub>Cl**

LR-MS (m/z): calculated for [M-Cl]<sup>-</sup>: 216.195, found: 216.1

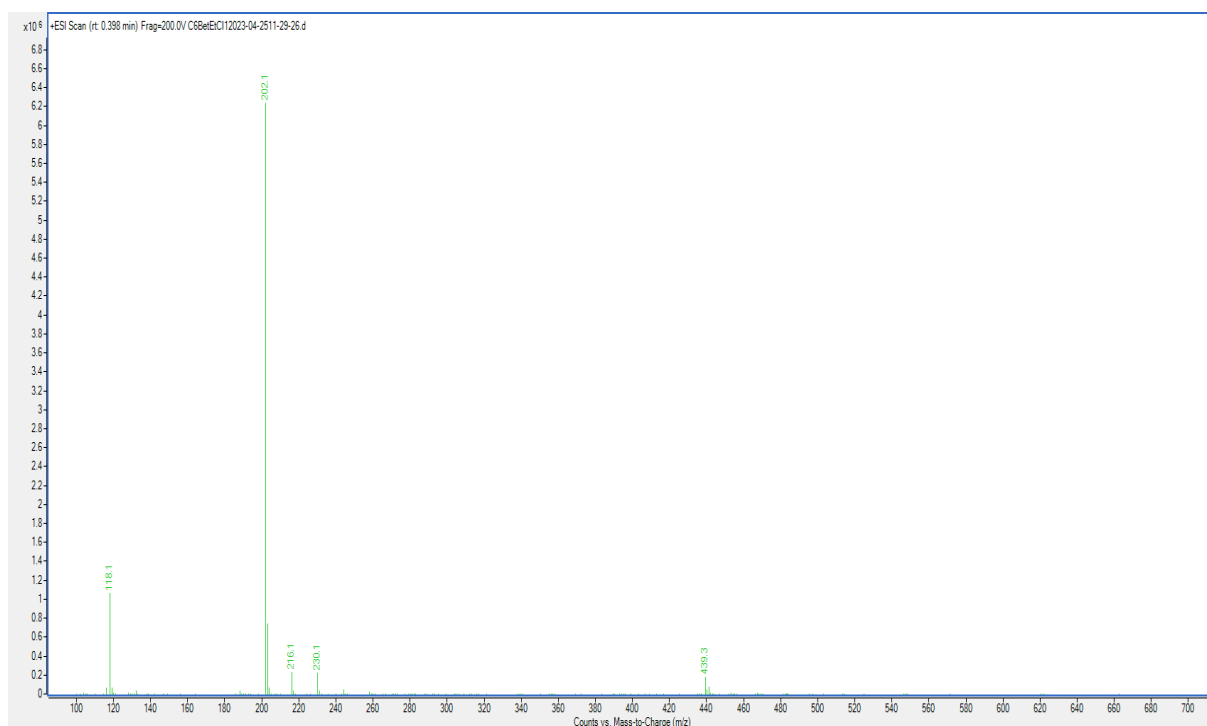

**Figure S15.** LR-MS (ESI) C<sub>6</sub>BetC<sub>2</sub>Cl

LR-MS (m/z): calculated for [M-Cl]<sup>-</sup>: 244.227, found: 244.2

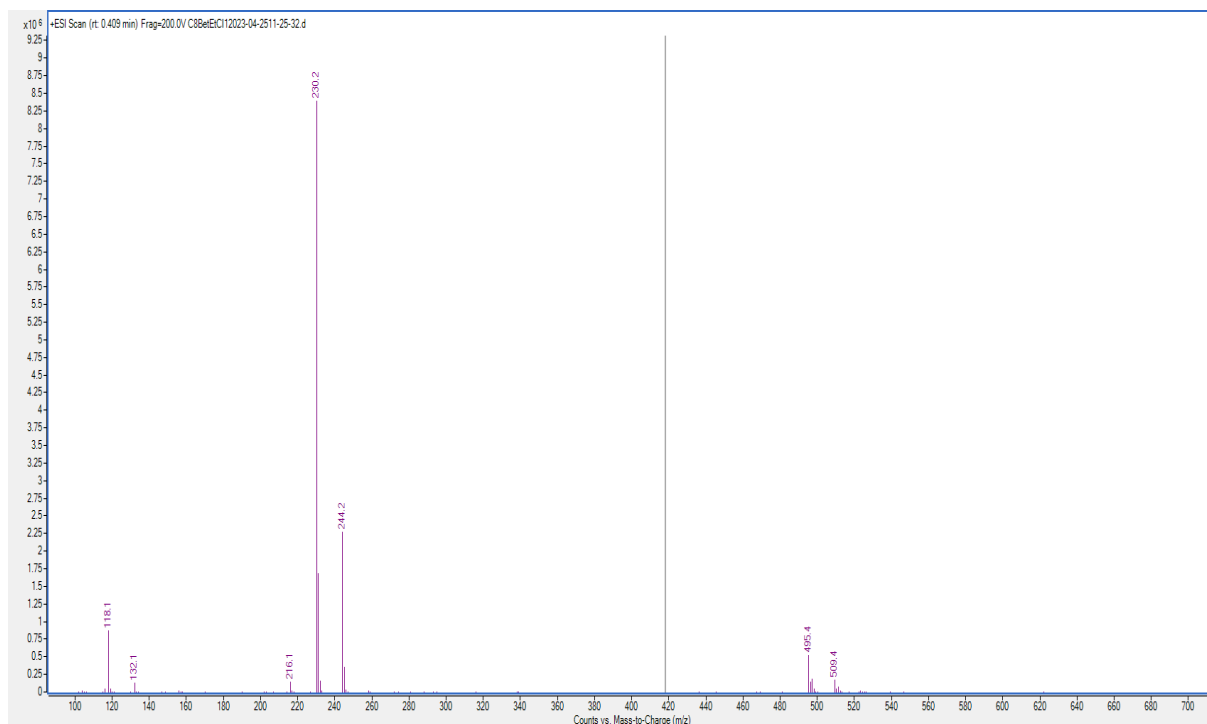

**Figure S16.** LR-MS (ESI) C<sub>8</sub>BetC<sub>2</sub>Cl

LR-MS (m/z): calculated for [M-Cl]<sup>-</sup>: 272.258, found: 272.2

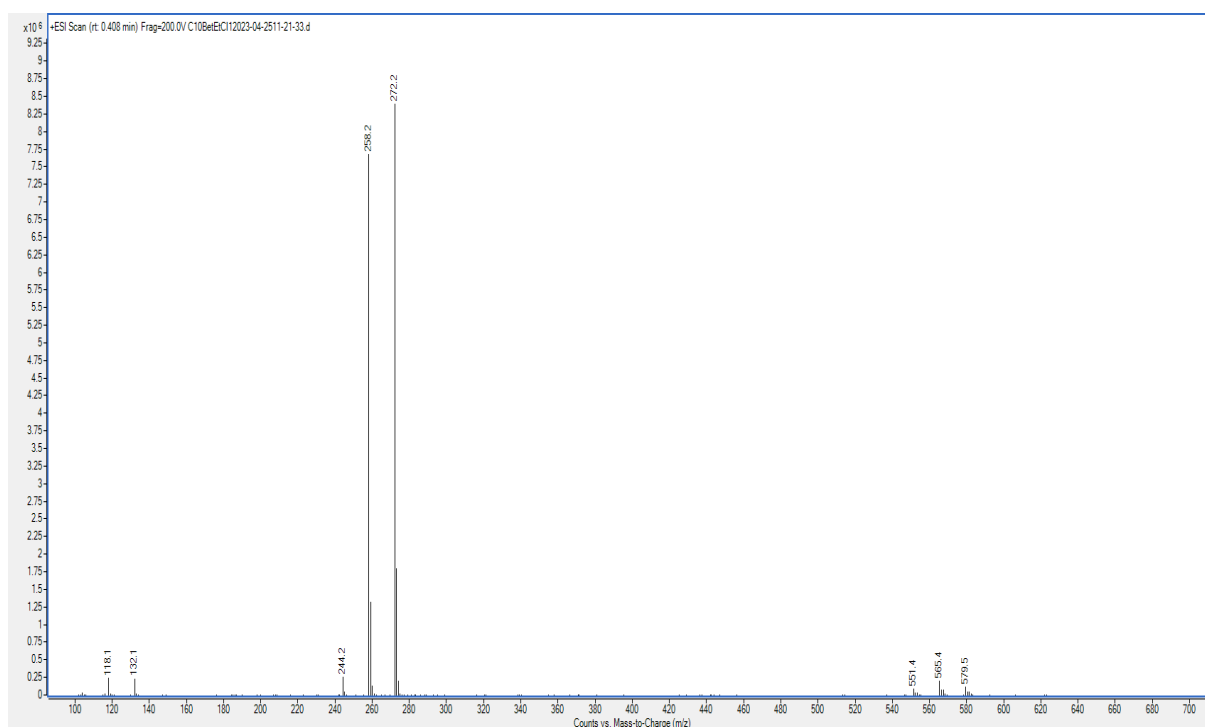

**Figure S17.** LR-MS (ESI) C<sub>10</sub>BetC<sub>2</sub>Cl

LR-MS (m/z): calculated for [M-Cl]<sup>-</sup>: 300.289, found: 300.3

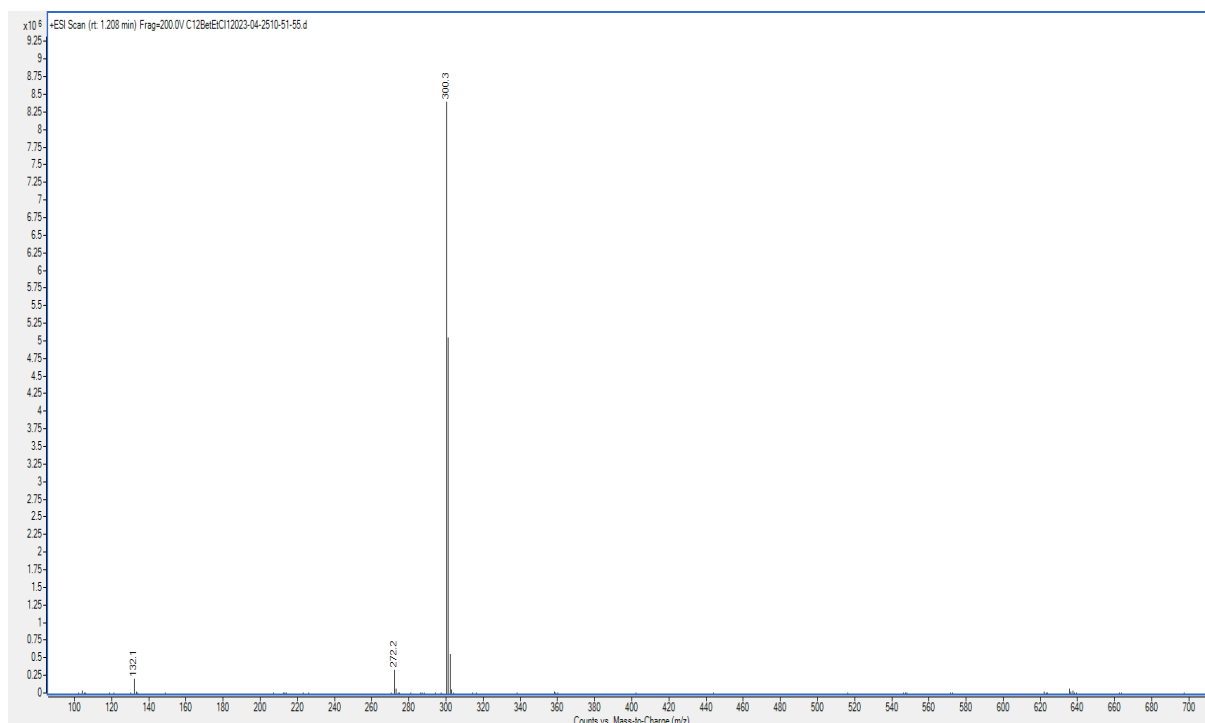

**Figure S18.** LR-MS (ESI) C<sub>12</sub>BetC<sub>2</sub>Cl

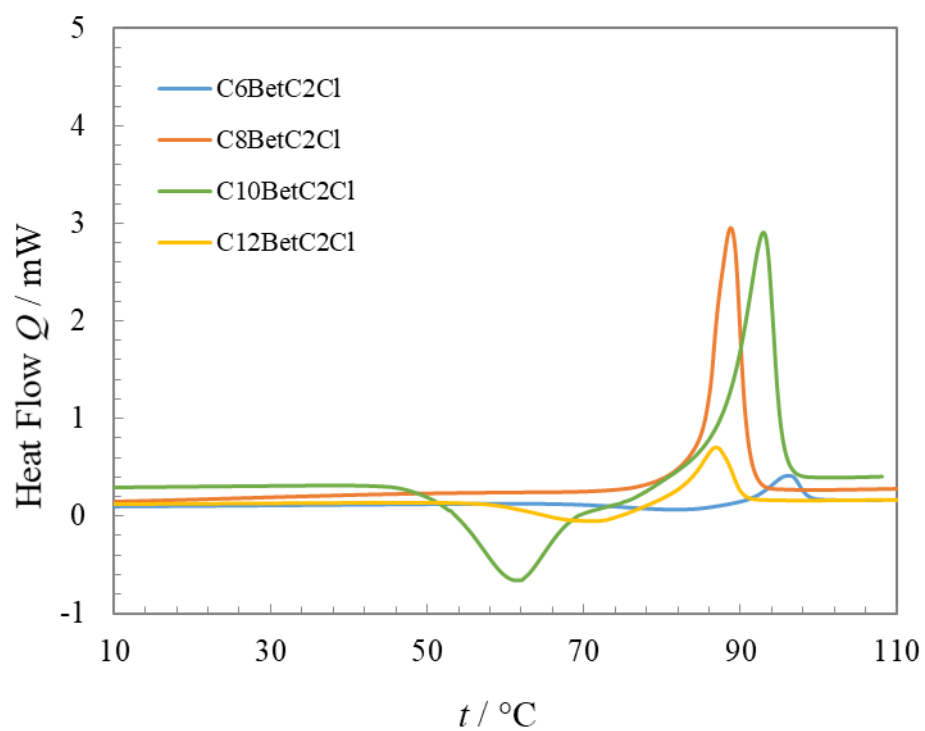

**Figure S19.** DSC of the synthesized *N*-alkyl betaine ethyl ester chlorides,  $C_n\text{BetC}_2\text{Cl}$

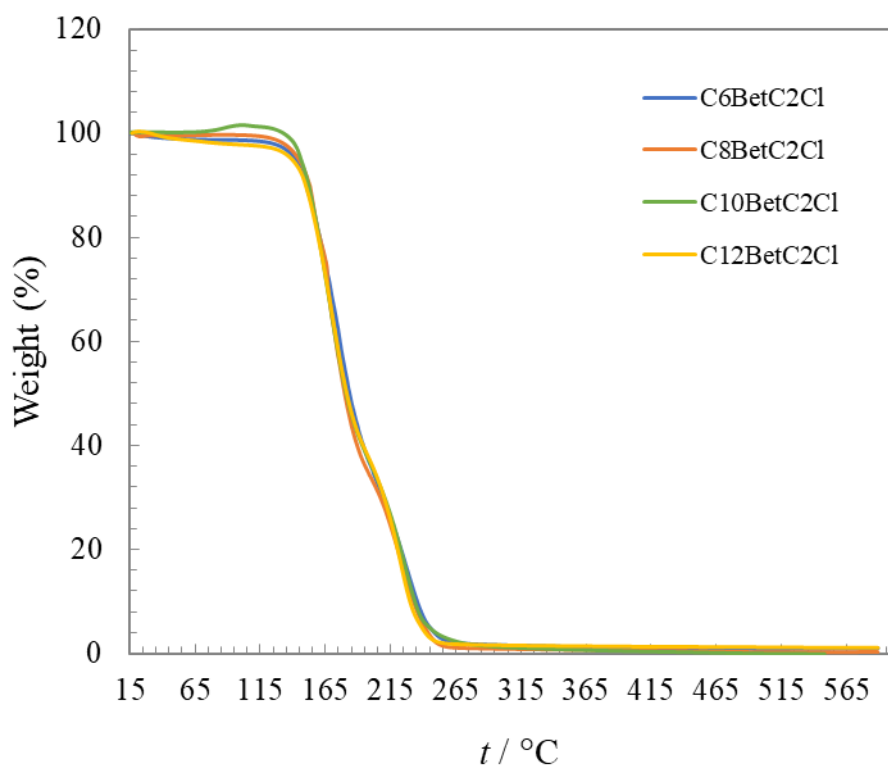

**Figure S20.** TGA diagrams for the synthesized *N*-alkyl betaine ethyl ester chlorides,  $C_n\text{BetC}_2\text{Cl}$

**Table S1.** Characteristics of materials used for the synthesis of *N*-alkyl betaine ester chlorides in this study

| Compound                    | CAS No.   | Source                   | Volume percentage purity <sup>a</sup> |
|-----------------------------|-----------|--------------------------|---------------------------------------|
| 1-Bromohexane               | 111-25-1  | Aldrich                  | 98                                    |
| 1-Bromooctane               | 111-83-1  | Aldrich                  | 99                                    |
| 1-Bromodecane               | 112-29-8  | Aldrich                  | 98                                    |
| 1-Bromododecane             | 143-15-7  | Aldrich                  | 95                                    |
| Dimethylamine hydrochloride | 506-59-2  | Acros Organics (Belgium) | 99                                    |
| Diethyl ether               | 60-29-7   | POCH S.A. (Poland)       | 99.5                                  |
| Ethanol                     | 64-17-5   | POCH S.A. (Poland)       | 99.8 <sup>b</sup>                     |
| Acetone                     | 67-64-1   | POCH S.A. (Poland)       | 99.5                                  |
| Sodium hydroxide            | 1310-73-2 | POCH S.A. (Poland)       | 99                                    |
| Ethyl chloroacetate         | 105-39-5  | POCH S.A. (Poland)       | 99                                    |

<sup>a</sup> according to supplier; <sup>b</sup> mass percentage

**Table S2.** Density, speed of sound, surface tension and dynamic viscosity of aqueous solutions of *N*-alkyl betaine ethyl esters chlorides, C<sub>*n*</sub>BetC<sub>2</sub>Cl (for *n* = 6, 8, 10 and 12 (1)) at 25 °C, and for C<sub>12</sub>BetC<sub>2</sub>Cl at temperatures *t* = (15 – 45) °C, with a step of 10 °C

| <i>m</i> / (mol·kg <sup>-1</sup> )                      | $\rho$ / (g·cm <sup>-3</sup> ) | <i>c</i> / (m·s <sup>-1</sup> ) | $\gamma$ / (mN·m <sup>-1</sup> ) | $\eta$ / (mPa·s) |
|---------------------------------------------------------|--------------------------------|---------------------------------|----------------------------------|------------------|
| C <sub>6</sub> BetC <sub>2</sub> Cl at <i>t</i> = 25 °C |                                |                                 |                                  |                  |
| 0                                                       | 0.997043                       | 1496.71                         | 71.99                            | 0.890            |
| 0.00020                                                 | 0.997047                       | 1496.73                         | 70.79                            | 0.888            |
| 0.00058                                                 | 0.997053                       | 1496.80                         | 70.21                            | 0.893            |
| 0.00095                                                 | 0.997059                       | 1496.87                         | 69.01                            | 0.896            |
| 0.00232                                                 | 0.997077                       | 1497.12                         | 68.65                            | 0.898            |
| 0.00488                                                 | 0.997114                       | 1497.49                         | 67.50                            | 0.899            |
| 0.01103                                                 | 0.997198                       | 1498.66                         | 66.16                            | 0.902            |
| 0.02046                                                 | 0.997330                       | 1500.69                         | 64.06                            | 0.908            |
| 0.05421                                                 | 0.997792                       | 1507.10                         | 59.49                            | 0.924            |
| 0.07805                                                 | 0.998123                       | 1511.58                         | 57.40                            | 0.943            |
| 0.10062                                                 | 0.998440                       | 1517.03                         | 55.36                            | 0.960            |
| 0.16739                                                 | 0.999358                       | 1527.75                         | 52.39                            | 1.010            |
| 0.23096                                                 | 1.000238                       | 1538.83                         | 50.64                            | 1.050            |
| C <sub>8</sub> BetC <sub>2</sub> Cl at <i>t</i> = 25 °C |                                |                                 |                                  |                  |
| 0.00010                                                 | 0.997044                       | 1496.75                         | 70.42                            | 0.890            |
| 0.00020                                                 | 0.997046                       | 1496.77                         | 68.27                            | 0.890            |
| 0.00050                                                 | 0.997052                       | 1496.85                         | 68.11                            | 0.898            |
| 0.00098                                                 | 0.997056                       | 1496.98                         | 67.47                            | 0.900            |

|         |          |         |       |       |
|---------|----------|---------|-------|-------|
| 0.00194 | 0.997064 | 1497.25 | 63.90 | 0.894 |
| 0.00504 | 0.997101 | 1497.94 | 59.02 | 0.904 |
| 0.01006 | 0.997154 | 1499.04 | 57.74 | 0.898 |
| 0.02005 | 0.997258 | 1501.18 | 55.21 | 0.904 |
| 0.05038 | 0.997587 | 1507.94 | 50.35 | 0.928 |
| 0.07673 | 0.997874 | 1513.15 | 46.89 | -     |
| 0.10098 | 0.998148 | 1518.86 | 43.93 | 0.984 |
| 0.12353 | 0.998371 | 1522.49 | 41.89 | -     |
| 0.14823 | 0.998601 | 1527.65 | 40.08 | 1.018 |
| 0.17219 | 0.998883 | 1531.74 | 39.74 | -     |
| 0.20934 | 0.999171 | 1537.09 | 38.95 | 1.066 |
| 0.29177 | 0.999941 | 1548.02 | 38.53 | -     |
| 0.35362 | 1.000260 | 1552.39 | 37.83 | 1.208 |

C<sub>10</sub>BetC<sub>2</sub>Cl at  $t = 25\text{ }^{\circ}\text{C}$

|         |          |         |       |       |
|---------|----------|---------|-------|-------|
| 0.00008 | 0.997044 | 1496.73 | 70.49 | 0.896 |
| 0.00022 | 0.997045 | 1496.76 | 69.86 | 0.899 |
| 0.00053 | 0.997047 | 1496.84 | 69.47 | 0.902 |
| 0.00094 | 0.997050 | 1496.95 | 68.23 | 0.898 |
| 0.00199 | 0.997058 | 1497.22 | 65.24 | 0.900 |
| 0.00528 | 0.997081 | 1498.05 | 58.91 | 0.896 |
| 0.00991 | 0.997114 | 1499.20 | 53.67 | 0.904 |
| 0.01964 | 0.997182 | 1501.57 | 49.01 | 0.911 |
| 0.04802 | 0.997373 | 1508.17 | 39.57 | 0.939 |
| 0.07519 | 0.997424 | 1511.39 | 38.82 | 0.969 |
| 0.10186 | 0.997397 | 1512.72 | 38.73 | 1.003 |
| 0.14891 | 0.997336 | 1514.59 | 37.69 | 1.068 |
| 0.18708 | 0.997288 | 1516.09 | 37.79 | 1.126 |
| 0.31366 | 0.997156 | 1521.15 | 37.22 | 1.336 |

C<sub>12</sub>BetC<sub>2</sub>Cl at  $t = 25\text{ }^{\circ}\text{C}$  (1)

|         |          |         |       |       |
|---------|----------|---------|-------|-------|
| 0.00012 | 0.997043 | 1496.81 | 67.47 | 0.889 |
| 0.00030 | 0.997045 | 1496.85 | 66.30 | 0.896 |
| 0.00077 | 0.997047 | 1496.97 | 64.14 | 0.895 |
| 0.00101 | 0.997049 | 1497.04 | 61.79 | 0.896 |
| 0.00222 | 0.997051 | 1497.35 | 56.13 | 0.892 |
| 0.00547 | 0.997063 | 1498.26 | 47.53 | 0.896 |
| 0.01033 | 0.99708  | 1499.55 | 39.80 | 0.902 |
| 0.01832 | 0.997054 | 1500.48 | 38.89 | 0.913 |
| 0.04753 | 0.996863 | 1501.53 | 38.49 | 0.969 |
| 0.07313 | 0.996701 | 1502.61 | 38.53 | 1.020 |
| 0.09783 | 0.996551 | 1503.52 | 37.97 | 1.068 |
| 0.17110 | 0.996132 | 1506.53 | 37.24 | 1.218 |
| 0.25323 | 0.995686 | 1509.87 | 37.21 | 1.434 |

C<sub>12</sub>BetC<sub>2</sub>Cl at  $t = 15\text{ }^{\circ}\text{C}$

|         |          |         |       |       |
|---------|----------|---------|-------|-------|
| 0       | 0.999089 | 1466.31 | 72.39 | 1.138 |
| 0.00007 | 0.999097 | 1466.36 | 71.11 | 1.137 |
| 0.00022 | 0.999100 | 1466.43 | 69.00 | 1.139 |
| 0.00045 | 0.999104 | 1466.53 | 66.71 | 1.138 |
| 0.00100 | 0.999107 | 1466.67 | 60.41 | 1.140 |
| 0.00241 | 0.999118 | 1467.16 | 55.84 | 1.142 |
| 0.00483 | 0.999135 | 1467.94 | 48.63 | 1.146 |



|         |          |         |       |       |
|---------|----------|---------|-------|-------|
| 0.01012 | 0.999172 | 1469.64 | 42.68 | 1.156 |
| 0.01992 | 0.999172 | 1471.22 | 40.07 | 1.174 |
| 0.05141 | 0.999038 | 1472.96 | 39.99 | 1.263 |
| 0.07442 | 0.998946 | 1474.32 | 39.57 | 1.317 |
| 0.09959 | 0.998850 | 1475.85 | 39.40 | 1.388 |
| 0.17494 | 0.998574 | 1480.54 | 38.97 | 1.599 |
| 0.20120 | 0.998487 | 1482.17 | 38.66 | 1.664 |
| 0.29168 | 0.998192 | 1487.71 | 38.06 | 1.968 |

$C_{12}BetC_2Cl$  at  $t = 25\text{ }^{\circ}C$  (2)

|         |          |         |       |       |
|---------|----------|---------|-------|-------|
| 0       | 0.997043 | 1496.73 | 71.99 | 0.890 |
| 0.00007 | 0.997053 | 1496.66 | 70.92 | 0.889 |
| 0.00022 | 0.997055 | 1496.70 | 68.47 | 0.891 |
| 0.00045 | 0.997058 | 1496.79 | 66.06 | 0.890 |
| 0.00100 | 0.997059 | 1496.91 | 58.80 | 0.892 |
| 0.00241 | 0.997066 | 1497.34 | 54.02 | 0.894 |
| 0.00483 | 0.997075 | 1497.98 | 47.54 | 0.896 |
| 0.01012 | 0.997096 | 1499.42 | 39.49 | 0.903 |
| 0.01992 | 0.997056 | 1500.44 | 38.94 | 0.918 |
| 0.05141 | 0.99685  | 1501.57 | 38.61 | 0.990 |
| 0.07442 | 0.996705 | 1502.46 | 37.71 | 1.030 |
| 0.09959 | 0.996555 | 1503.48 | 37.40 | 1.086 |
| 0.17494 | 0.996114 | 1506.58 | 37.31 | 1.247 |
| 0.20120 | 0.995971 | 1507.64 | 37.17 | 1.301 |
| 0.29168 | 0.995494 | 1511.24 | 37.23 | 1.501 |

$C_{12}BetC_2Cl$  at  $t = 35\text{ }^{\circ}C$

|         |          |         |       |       |
|---------|----------|---------|-------|-------|
| 0       | 0.994054 | 1519.25 | 70.60 | 0.719 |
| 0.00007 | 0.994052 | 1519.69 | 68.12 | 0.718 |
| 0.00022 | 0.994052 | 1519.72 | 67.31 | 0.720 |
| 0.00045 | 0.994053 | 1519.79 | 62.67 | 0.718 |
| 0.00100 | 0.994052 | 1519.92 | 56.80 | 0.721 |
| 0.00241 | 0.994054 | 1520.26 | 52.99 | 0.721 |
| 0.00483 | 0.994056 | 1520.80 | 46.61 | 0.722 |
| 0.01012 | 0.994057 | 1521.98 | 39.05 | 0.728 |
| 0.01992 | 0.993995 | 1522.68 | 38.27 | 0.741 |
| 0.05141 | 0.993731 | 1523.19 | 37.85 | 0.797 |
| 0.07442 | 0.993544 | 1523.61 | 37.16 | 0.830 |
| 0.09959 | 0.993347 | 1524.10 | 36.90 | 0.875 |
| 0.17494 | 0.992779 | 1525.64 | 36.62 | 1.003 |
| 0.20120 | 0.992589 | 1526.15 | 36.70 | 1.044 |
| 0.29168 | 0.991966 | 1527.93 | 36.66 | 1.209 |

$C_{12}BetC_2Cl$  at  $t = 45\text{ }^{\circ}C$

|         |          |         |       |       |
|---------|----------|---------|-------|-------|
| 0       | 0.990235 | 1536.62 | 69.06 | 0.598 |
| 0.00007 | 0.990240 | 1536.66 | 65.99 | 0.597 |
| 0.00022 | 0.990235 | 1536.68 | 64.97 | 0.599 |
| 0.00045 | 0.990241 | 1536.73 | 60.75 | 0.598 |
| 0.00100 | 0.990240 | 1536.84 | 55.27 | 0.599 |
| 0.00241 | 0.990232 | 1537.11 | 52.09 | 0.599 |
| 0.00483 | 0.990228 | 1537.54 | 45.29 | 0.600 |
| 0.01012 | 0.990219 | 1538.51 | 38.60 | 0.605 |
| 0.01992 | 0.990142 | 1539.03 | 37.75 | 0.615 |

|         |          |         |       |       |
|---------|----------|---------|-------|-------|
| 0.05141 | 0.989830 | 1538.91 | 37.32 | 0.660 |
| 0.07442 | 0.989609 | 1538.88 | 36.71 | 0.687 |
| 0.09959 | 0.989376 | 1538.86 | 36.31 | 0.723 |
| 0.17494 | 0.988700 | 1538.89 | 36.08 | 0.828 |
| 0.20120 | 0.988476 | 1538.89 | 36.00 | 0.862 |
| 0.29168 | 0.987733 | 1539.02 | 36.10 | 0.997 |

Standard uncertainties:  $u(t) = 0.01$  °C, for density and speed of sound;  $u(t) = 0.02$  °C for viscosity;  $u(t) = 0.1$  °C for surface tension;  $u(P) = 0.01$  MPa,  $u(m) = 1 \cdot 10^{-5}$  mol·kg<sup>-1</sup>,  $u(\rho) = 2 \cdot 10^{-5}$  g·cm<sup>-3</sup>,  $u(c) = 0.1$  m·s<sup>-1</sup>;  $u(\gamma) = 0.2$  mN·m<sup>-1</sup>;  $u(\eta) = 0.5\%$

**Table S3.** Coefficients of equations:  $y = \sum_{i=0}^{n=2} y_i \cdot m^i$  describing concentration dependence of density,  $\rho$ , and speed of sound,  $c$ , and:  $\gamma = a + b \cdot \log m$  for surface tension,  $\gamma$ , of aqueous solutions of *N*-alkyl betaine ethyl esters chlorides, C<sub>*n*</sub>BetC<sub>2</sub>Cl (for *n* = 6, 8, 10, 12 (1)) at 25 °C, and for C<sub>12</sub>BetC<sub>2</sub>Cl at temperatures  $t = (15 - 45)$  °C, with a step of 10 K, together with the mean deviations from the regression line:  $\delta\rho$ ,  $\delta c$ ,  $\delta\gamma$  and CMC (if attainable) calculated based on the intersection of the curves before and after CMC; for density and speed of sound there is one equation for C<sub>6</sub>BetC<sub>2</sub>Cl and C<sub>8</sub>BetC<sub>2</sub>Cl, and two independent equations were found, before and after CMC for C<sub>10</sub>BetC<sub>2</sub>Cl and C<sub>12</sub>BetC<sub>2</sub>Cl.

| C <sub>6</sub> BetC <sub>2</sub> Cl at $t = 25\text{ }^{\circ}\text{C}$                                  |                                                                            |                                                                              |              |
|----------------------------------------------------------------------------------------------------------|----------------------------------------------------------------------------|------------------------------------------------------------------------------|--------------|
| $\rho_0 / (\text{g}\cdot\text{cm}^{-3})$                                                                 | $\rho_1 / (\text{g}\cdot\text{cm}^{-3}\cdot\text{kg}\cdot\text{mol}^{-1})$ | $\rho_2 / (\text{g}\cdot\text{cm}^{-3}\cdot\text{kg}^2\cdot\text{mol}^{-2})$ | $\delta\rho$ |
| $0.9970450 \pm 0.0000008$                                                                                | $0.013826 \pm 0.000026$                                                    | $-0.0000120 \pm 0.000124$                                                    | 0.000002     |
| $c_0 / (\text{m}\cdot\text{s}^{-1})$                                                                     | $c_1 / (\text{m}\cdot\text{s}^{-1}\cdot\text{kg}\cdot\text{mol}^{-1})$     | $c_2 / (\text{m}\cdot\text{s}^{-1}\cdot\text{kg}^2\cdot\text{mol}^{-2})$     | $\delta c$   |
| $1496.62 \pm 0.13$                                                                                       | $203.5 \pm 4.4$                                                            | $-91 \pm 21$                                                                 | 0.3          |
| C <sub>8</sub> BetC <sub>2</sub> Cl at $t = 25\text{ }^{\circ}\text{C}$ (for density and speed of sound) |                                                                            |                                                                              |              |
| $\rho_0 / (\text{g}\cdot\text{cm}^{-3})$                                                                 | $\rho_1 / (\text{g}\cdot\text{cm}^{-3}\cdot\text{kg}\cdot\text{mol}^{-1})$ | $\rho_2 / (\text{g}\cdot\text{cm}^{-3}\cdot\text{kg}^2\cdot\text{mol}^{-2})$ | $\delta\rho$ |
| $0.9970370 \pm 0.0000090$                                                                                | $0.01175 \pm 0.00019$                                                      | $-0.00708 \pm 0.00060$                                                       | 0.00003      |
| $c_0 / (\text{m}\cdot\text{s}^{-1})$                                                                     | $c_1 / (\text{m}\cdot\text{s}^{-1}\cdot\text{kg}\cdot\text{mol}^{-1})$     | $c_2 / (\text{m}\cdot\text{s}^{-1}\cdot\text{kg}^2\cdot\text{mol}^{-2})$     | $\delta c$   |
| $1496.62 \pm 0.12$                                                                                       | $242.6 \pm 2.4$                                                            | $-236.0 \pm 7.7$                                                             | 0.4          |
| C <sub>8</sub> BetC <sub>2</sub> Cl at $t = 25\text{ }^{\circ}\text{C}$ (surface tension below CMC)      |                                                                            |                                                                              |              |
| $a$                                                                                                      | $b$                                                                        | $\delta\gamma$                                                               |              |
| $22.24 \pm 1.10$                                                                                         | $-21.80 \pm 1.01$                                                          | 0.3                                                                          |              |
| C <sub>8</sub> BetC <sub>2</sub> Cl at $t = 25\text{ }^{\circ}\text{C}$ (surface tension after CMC)      |                                                                            |                                                                              |              |
| $a$                                                                                                      | $b$                                                                        | $\delta\gamma$                                                               |              |
| $35.31 \pm 0.37$                                                                                         | $-5.71 \pm 0.56$                                                           | 0.2                                                                          |              |
| $CMC / \text{mol}\cdot\text{kg}^{-1}$                                                                    | 0.154                                                                      |                                                                              |              |
| C <sub>10</sub> BetC <sub>2</sub> Cl at $t = 25\text{ }^{\circ}\text{C}$ (below CMC)                     |                                                                            |                                                                              |              |
| $\rho_0 / (\text{g}\cdot\text{cm}^{-3})$                                                                 | $\rho_1 / (\text{g}\cdot\text{cm}^{-3}\cdot\text{kg}\cdot\text{mol}^{-1})$ | $\rho_2 / (\text{g}\cdot\text{cm}^{-3}\cdot\text{kg}^2\cdot\text{mol}^{-2})$ | $\delta\rho$ |

|                                                                            |                                                                            |                                                                              |              |
|----------------------------------------------------------------------------|----------------------------------------------------------------------------|------------------------------------------------------------------------------|--------------|
| 0.9970441 ± 0.0000006                                                      | 0.006886 ± 0.000036                                                        | -                                                                            | 0.000002     |
| $c_0 / (\text{m}\cdot\text{s}^{-1})$                                       | $c_1 / (\text{m}\cdot\text{s}^{-1}\cdot\text{kg}\cdot\text{mol}^{-1})$     | $c_2 / (\text{m}\cdot\text{s}^{-1}\cdot\text{kg}^2\cdot\text{mol}^{-2})$     | $\delta c$   |
| 1496.75 ± 0.02                                                             | 238.2 ± 1.4                                                                | -                                                                            | 0.06         |
| $a$                                                                        | $b$                                                                        | $\delta\gamma$                                                               |              |
| 13.96 ± 2.43                                                               | -19.89 ± 1.31                                                              | 0.9                                                                          |              |
| C <sub>10</sub> BetC <sub>2</sub> Cl at $t = 25$ °C (after CMC)            |                                                                            |                                                                              |              |
| $\rho_0 / (\text{g}\cdot\text{cm}^{-3})$                                   | $\rho_1 / (\text{g}\cdot\text{cm}^{-3}\cdot\text{kg}\cdot\text{mol}^{-1})$ | $\rho_2 / (\text{g}\cdot\text{cm}^{-3}\cdot\text{kg}^2\cdot\text{mol}^{-2})$ | $\delta\rho$ |
| 0.997508 ± 0.000006                                                        | -0.001135 ± 0.000031                                                       | -                                                                            | 0.00001      |
| $CMC (\rho) / \text{mol}\cdot\text{kg}^{-1}$                               | 0.058                                                                      |                                                                              |              |
| $c_0 / (\text{m}\cdot\text{s}^{-1})$                                       | $c_1 / (\text{m}\cdot\text{s}^{-1}\cdot\text{kg}\cdot\text{mol}^{-1})$     | $c_2 / (\text{m}\cdot\text{s}^{-1}\cdot\text{kg}^2\cdot\text{mol}^{-2})$     | $\delta c$   |
| 1508.49 ± 0.11                                                             | 40.48 ± 0.61                                                               | -                                                                            | 0.11         |
| $CMC (c) / \text{mol}\cdot\text{kg}^{-1}$                                  | 0.059                                                                      |                                                                              |              |
| $a$                                                                        | $b$                                                                        | $\delta\gamma$                                                               |              |
| 35.74 ± 0.45                                                               | -2.77 ± 0.52                                                               | 0.25                                                                         |              |
| $CMC (\gamma) / \text{mol}\cdot\text{kg}^{-1}$                             | 0.053                                                                      |                                                                              |              |
| C <sub>12</sub> BetC <sub>2</sub> Cl at $t = 25$ °C (below CMC) (1)        |                                                                            |                                                                              |              |
| $\rho_0 / (\text{g}\cdot\text{cm}^{-3})$                                   | $\rho_1 / (\text{g}\cdot\text{cm}^{-3}\cdot\text{kg}\cdot\text{mol}^{-1})$ | $\rho_2 / (\text{g}\cdot\text{cm}^{-3}\cdot\text{kg}^2\cdot\text{mol}^{-2})$ | $\delta\rho$ |
| 0.9970437 ± 0.0000004                                                      | 0.00352 ± 0.00010                                                          | -                                                                            | 0.0000001    |
| $c_0 / (\text{m}\cdot\text{s}^{-1})$                                       | $c_1 / (\text{m}\cdot\text{s}^{-1}\cdot\text{kg}\cdot\text{mol}^{-1})$     | $c_2 / (\text{m}\cdot\text{s}^{-1}\cdot\text{kg}^2\cdot\text{mol}^{-2})$     | $\delta c$   |
| 1496.76 ± 0.01                                                             | 270.6 ± 1.8                                                                | -                                                                            | 0.02         |
| $a$                                                                        | $b$                                                                        | $\delta\gamma$                                                               |              |
| -1.03 ± 3.05                                                               | -21.10 ± 1.16                                                              | 1.1                                                                          |              |
| C <sub>12</sub> BetC <sub>2</sub> Cl at $t = 25$ °C (after CMC) (1)        |                                                                            |                                                                              |              |
| $\rho_0 / (\text{g}\cdot\text{cm}^{-3}\cdot\text{kg}\cdot\text{mol}^{-1})$ | $\rho_1 / (\text{g}\cdot\text{cm}^{-3}\cdot\text{kg}\cdot\text{mol}^{-3})$ | $\rho_2 / (\text{g}\cdot\text{cm}^{-3}\cdot\text{kg}\cdot\text{mol}^{-1})$   | $\delta\rho$ |
| 0.997136 ± 0.000013                                                        | -0.00579 ± 0.0001                                                          | -                                                                            | 0.00002      |
| $CMC (\rho) / \text{mol}\cdot\text{kg}^{-1}$                               | 0.01                                                                       |                                                                              |              |
| $c_0 / (\text{m}\cdot\text{s}^{-1})$                                       | $c_1 / (\text{m}\cdot\text{s}^{-1}\cdot\text{kg}\cdot\text{mol}^{-1})$     | $c_2 / (\text{m}\cdot\text{s}^{-1}\cdot\text{kg}^2\cdot\text{mol}^{-2})$     | $\delta c$   |
| 1499.66 ± 0.04                                                             | 40.17 ± 0.32                                                               | -                                                                            | 0.06         |
| $CMC (c) / \text{mol}\cdot\text{kg}^{-1}$                                  | 0.013                                                                      |                                                                              |              |
| $a$                                                                        | $b$                                                                        | $\delta\gamma$                                                               |              |

|                                                                          |                                                                           |                                                                                         |          |
|--------------------------------------------------------------------------|---------------------------------------------------------------------------|-----------------------------------------------------------------------------------------|----------|
| 36.27   0.35                                                             | -1.63   0.30                                                              | 0.27                                                                                    |          |
| CMC (γ) / mol·kg <sup>-1</sup>                                           | 0.012                                                                     |                                                                                         |          |
| C <sub>12</sub> BetC <sub>2</sub> Cl at <i>t</i> = 15 °C (below CMC)     |                                                                           |                                                                                         |          |
| ρ <sub>0</sub> / (g·cm <sup>-3</sup> )                                   | ρ <sub>1</sub> / (g·cm <sup>-3</sup> ·kg·mol <sup>-1</sup> <sub>1</sub> ) | ρ <sub>2</sub> / (g·cm <sup>-3</sup> ·kg <sup>2</sup> ·mol <sup>-2</sup> <sub>2</sub> ) | δρ       |
| 0.9990970 ± 0.0000020                                                    | 0.00755 ± 0.00043                                                         | -                                                                                       | 0.000004 |
| c <sub>0</sub> / (m·s <sup>-1</sup> )                                    | c <sub>1</sub> / (m·s <sup>-1</sup> ·kg·mol <sup>-1</sup> )               | c <sub>2</sub> / (m·s <sup>-1</sup> ·kg <sup>2</sup> ·mol <sup>-2</sup> )               | δc       |
| 1466.351 ± 0.011                                                         | 326.2 ± 2.7                                                               | -                                                                                       | 0.03     |
| <i>a</i>                                                                 | <i>b</i>                                                                  | δγ                                                                                      |          |
| 8.08 ± 2.66                                                              | -17.62 ± 0.99                                                             | 0.98                                                                                    |          |
| C <sub>12</sub> BetC <sub>2</sub> Cl at <i>t</i> = 15 °C (above CMC)     |                                                                           |                                                                                         |          |
| ρ <sub>0</sub> / (g·cm <sup>-3</sup> )                                   | ρ <sub>1</sub> / (g·cm <sup>-3</sup> ·kg·mol <sup>-1</sup> <sub>1</sub> ) | ρ <sub>2</sub> / (g·cm <sup>-3</sup> ·kg <sup>2</sup> ·mol <sup>-2</sup> <sub>2</sub> ) | δρ       |
| 0.9992530 ± 0.0000030                                                    | -0.00425 ± 0.00005                                                        | 0.00211 ± 0.00015                                                                       | 0.000003 |
| CMC (ρ) / mol·kg <sup>-1</sup>                                           | 0.013                                                                     |                                                                                         |          |
| c <sub>0</sub> / (m·s <sup>-1</sup> )                                    | c <sub>1</sub> / (m·s <sup>-1</sup> ·kg·mol <sup>-1</sup> )               | c <sub>2</sub> / (m·s <sup>-1</sup> ·kg <sup>2</sup> ·mol <sup>-2</sup> )               | δc       |
| 1469.852 ± 0.060                                                         | 61.11 ± 0.38                                                              | -                                                                                       | 0.09     |
| CMC (c) / mol·kg <sup>-1</sup>                                           | 0.013                                                                     |                                                                                         |          |
| <i>a</i>                                                                 | <i>b</i>                                                                  | δγ                                                                                      |          |
| 37.51 ± 0.32                                                             | -1.70 ± 0.29                                                              | 0.29                                                                                    |          |
| CMC (γ) / mol·kg <sup>-1</sup>                                           | 0.014                                                                     |                                                                                         |          |
| C <sub>12</sub> BetC <sub>2</sub> Cl at <i>t</i> = 25 °C (below CMC) (2) |                                                                           |                                                                                         |          |
| ρ <sub>0</sub> / (g·cm <sup>-3</sup> )                                   | ρ <sub>1</sub> / (g·cm <sup>-3</sup> ·kg·mol <sup>-1</sup> <sub>1</sub> ) | ρ <sub>2</sub> / (g·cm <sup>-3</sup> ·kg <sup>2</sup> ·mol <sup>-2</sup> <sub>2</sub> ) | δρ       |
| 0.9970540 ± 0.0000010                                                    | 0.00420 ± 0.00017                                                         | -                                                                                       | 0.000002 |
| c <sub>0</sub> / (m·s <sup>-1</sup> )                                    | c <sub>1</sub> / (m·s <sup>-1</sup> ·kg·mol <sup>-1</sup> )               | c <sub>2</sub> / (m·s <sup>-1</sup> ·kg <sup>2</sup> ·mol <sup>-2</sup> )               | δc       |
| 1496.666 ± 0.015                                                         | 272.081 ± 3.6                                                             | -                                                                                       | 0.03     |
| <i>a</i>                                                                 | <i>b</i>                                                                  | δγ                                                                                      |          |
| 2.9 ± 3.3                                                                | -19.0 ± 1.2                                                               | 1.3                                                                                     |          |
| C <sub>12</sub> BetC <sub>2</sub> Cl at <i>t</i> = 25 °C (above CMC) (2) |                                                                           |                                                                                         |          |
| ρ <sub>0</sub> / (g·cm <sup>-3</sup> )                                   | ρ <sub>1</sub> / (g·cm <sup>-3</sup> ·kg·mol <sup>-1</sup> <sub>1</sub> ) | ρ <sub>2</sub> / (g·cm <sup>-3</sup> ·kg <sup>2</sup> ·mol <sup>-2</sup> <sub>2</sub> ) | δρ       |
| 0.9971840 ± 0.0000030                                                    | -0.006597 ± 0.000046                                                      | 0.002768 ± 0.000144                                                                     | 0.000003 |
| CMC (ρ) / mol·kg <sup>-1</sup>                                           | 0.012                                                                     |                                                                                         |          |
| c <sub>0</sub> / (m·s <sup>-1</sup> )                                    | c <sub>1</sub> / (m·s <sup>-1</sup> ·kg·mol <sup>-1</sup> )               | c <sub>2</sub> / (m·s <sup>-1</sup> ·kg <sup>2</sup> ·mol <sup>-2</sup> )               | δc       |
| 1499.541 ± 0.042                                                         | 40.11 ± 0.27                                                              | -                                                                                       | 0.06     |
| CMC (c) / mol·kg <sup>-1</sup>                                           | 0.013                                                                     |                                                                                         |          |
| <i>a</i>                                                                 | <i>b</i>                                                                  | δγ                                                                                      |          |

|                                                               |                                                                           |                                                                                         |          |
|---------------------------------------------------------------|---------------------------------------------------------------------------|-----------------------------------------------------------------------------------------|----------|
| 36.07 ± 0.31                                                  | -1.67 ± 0.29                                                              | 0.28                                                                                    |          |
| CMC (γ) / mol·kg <sup>-1</sup>                                | 0.012                                                                     |                                                                                         |          |
| C <sub>12</sub> BetC <sub>2</sub> Cl at t = 35 °C (below CMC) |                                                                           |                                                                                         |          |
| ρ <sub>0</sub> / (g·cm <sup>-3</sup> )                        | ρ <sub>1</sub> / (g·cm <sup>-3</sup> ·kg·mol <sup>-1</sup> <sub>1</sub> ) | ρ <sub>2</sub> / (g·cm <sup>-3</sup> ·kg <sup>2</sup> ·mol <sup>-2</sup> <sub>2</sub> ) | δρ       |
| 0.994053 ± 0.0000010                                          | 0.00048 ± 0.00010                                                         | -                                                                                       | 0.000001 |
| c <sub>0</sub> / (m·s <sup>-1</sup> )                         | c <sub>1</sub> / (m·s <sup>-1</sup> ·kg·mol <sup>-1</sup> )               | c <sub>2</sub> / (m·s <sup>-1</sup> ·kg <sup>2</sup> ·mol <sup>-2</sup> )               | δc       |
| 1519.604 ± 0.070                                              | 240 ± 17                                                                  | -                                                                                       | 0.16     |
| a                                                             | b                                                                         | δγ                                                                                      |          |
| 6.82 ± 3.91                                                   | -16.88 ± 1.45                                                             | 1.6                                                                                     |          |
| C <sub>12</sub> BetC <sub>2</sub> Cl at t = 35 °C (above CMC) |                                                                           |                                                                                         |          |
| ρ <sub>0</sub> / (g·cm <sup>-3</sup> )                        | ρ <sub>1</sub> / (g·cm <sup>-3</sup> ·kg·mol <sup>-1</sup> <sub>1</sub> ) | ρ <sub>2</sub> / (g·cm <sup>-3</sup> ·kg <sup>2</sup> ·mol <sup>-2</sup> <sub>2</sub> ) | δρ       |
| 0.9941600 ± 0.0000030                                         | -0.008479 ± 0.000045                                                      | 0.003299 ± 0.000142                                                                     | 0.000003 |
| CMC (ρ) / mol·kg <sup>-1</sup>                                | 0.012                                                                     |                                                                                         |          |
| c <sub>0</sub> / (m·s <sup>-1</sup> )                         | c <sub>1</sub> / (m·s <sup>-1</sup> ·kg·mol <sup>-1</sup> )               | c <sub>2</sub> / (m·s <sup>-1</sup> ·kg <sup>2</sup> ·mol <sup>-2</sup> )               | δc       |
| 1522.203 ± 0.035                                              | 19.58 ± 0.22                                                              | -                                                                                       | 0.05     |
| CMC (c) / mol·kg <sup>-1</sup>                                | 0.012                                                                     |                                                                                         |          |
| a                                                             | b                                                                         | δγ                                                                                      |          |
| 35.60 ± 0.24                                                  | -1.55 ± 0.22                                                              | 0.22                                                                                    |          |
| CMC (γ) / mol·kg <sup>-1</sup>                                | 0.013                                                                     |                                                                                         |          |
| C <sub>12</sub> BetC <sub>2</sub> Cl at t = 45 °C (below CMC) |                                                                           |                                                                                         |          |
| ρ <sub>0</sub> / (g·cm <sup>-3</sup> )                        | ρ <sub>1</sub> / (g·cm <sup>-3</sup> ·kg·mol <sup>-1</sup> <sub>1</sub> ) | ρ <sub>2</sub> / (g·cm <sup>-3</sup> ·kg <sup>2</sup> ·mol <sup>-2</sup> <sub>2</sub> ) | δρ       |
| 0.9902380 ± 0.0000010                                         | -0.001961 ± 0.000316                                                      | -                                                                                       | 0.000003 |
| c <sub>0</sub> / (m·s <sup>-1</sup> )                         | c <sub>1</sub> / (m·s <sup>-1</sup> ·kg·mol <sup>-1</sup> )               | c <sub>2</sub> / (m·s <sup>-1</sup> ·kg <sup>2</sup> ·mol <sup>-2</sup> )               | δc       |
| 1536.644 ± 0.006                                              | 185.0 ± 1.5                                                               | -                                                                                       | 0.01     |
| a                                                             | b                                                                         | δγ                                                                                      |          |
| 8.1 ± 4.0                                                     | -15.9 ± 1.5                                                               | 1.6                                                                                     |          |
| C <sub>12</sub> BetC <sub>2</sub> Cl at t = 45 °C (above CMC) |                                                                           |                                                                                         |          |
| ρ <sub>0</sub> / (g·cm <sup>-3</sup> )                        | ρ <sub>1</sub> / (g·cm <sup>-3</sup> ·kg·mol <sup>-1</sup> <sub>1</sub> ) | ρ <sub>2</sub> / (g·cm <sup>-3</sup> ·kg <sup>2</sup> ·mol <sup>-2</sup> <sub>2</sub> ) | δρ       |
| 0.9903370 ± 0.0000030                                         | -0.010018 ± 0.000049                                                      | 0.00375 ± 0.00016                                                                       | 0.000003 |
| CMC (ρ) / mol·kg <sup>-1</sup>                                | 0.012                                                                     |                                                                                         |          |
| c <sub>0</sub> / (m·s <sup>-1</sup> )                         | c <sub>1</sub> / (m·s <sup>-1</sup> ·kg·mol <sup>-1</sup> )               | c <sub>2</sub> / (m·s <sup>-1</sup> ·kg <sup>2</sup> ·mol <sup>-2</sup> )               | δc       |
| 1538.913 ± 0.051                                              | 0.10 ± 0.32                                                               | -                                                                                       | 0.08     |
| CMC (c) / mol·kg <sup>-1</sup>                                | 0.012                                                                     |                                                                                         |          |
| a                                                             | b                                                                         | δγ                                                                                      |          |
| 34.95 ± 0.25                                                  | -1.64 ± 0.23                                                              | 0.22                                                                                    |          |

|                                                |       |
|------------------------------------------------|-------|
| $CMC (\gamma) / \text{mol}\cdot\text{kg}^{-1}$ | 0.013 |
|------------------------------------------------|-------|

**Table S4.** Apparent molar volume,  $V_\phi$ , adiabatic compressibility,  $\kappa_s$ , and apparent molar compressibility,  $K_{S\phi}$  of *N*-alkyl betaine ethyl esters chlorides,  $C_n\text{BetC}_2\text{Cl}$  (for  $n = 6, 8, 10$ , [12](#) [\(1\)](#)) in aqueous solutions at 25 °C, and for  $C_{12}\text{BetC}_2\text{Cl}$  at temperatures  $t = (15 - 45)^\circ\text{C}$ , with a step of 10 °C

| $m / (\text{mol}\cdot\text{kg}^{-1})$                    | $V_\phi \cdot 10^6 /$<br>( $\text{m}^3\cdot\text{mol}^{-1}$ ) | $\delta V_\phi \cdot 10^6 /$<br>( $\text{m}^3\cdot\text{mol}^{-1}$ ) | $\kappa_s \cdot 10^{10} /$<br>( $\text{Pa}^{-1}$ ) | $K_{S\phi} \cdot 10^{13} /$<br>( $\text{m}^3\cdot\text{mol}^{-1}\cdot\text{Pa}^{-1}$ ) |
|----------------------------------------------------------|---------------------------------------------------------------|----------------------------------------------------------------------|----------------------------------------------------|----------------------------------------------------------------------------------------|
| $C_6\text{BetC}_2\text{Cl}$ at $t = 25^\circ\text{C}$    |                                                               |                                                                      |                                                    |                                                                                        |
| 0.00020                                                  | 231.96                                                        | 1.1                                                                  | 4.47                                               | -0.57                                                                                  |
| 0.00058                                                  | 235.07                                                        | 0.3                                                                  | 4.47                                               | -0.43                                                                                  |
| 0.00095                                                  | 235.58                                                        | 0.2                                                                  | 4.47                                               | -0.31                                                                                  |
| 0.00232                                                  | 237.79                                                        | 0.07                                                                 | 4.47                                               | -0.18                                                                                  |
| 0.00488                                                  | 237.88                                                        | 0.03                                                                 | 4.47                                               | -0.01                                                                                  |
| 0.01103                                                  | 238.37                                                        | 0.01                                                                 | 4.46                                               | -0.08                                                                                  |
| 0.02046                                                  | 238.36                                                        | 0.01                                                                 | 4.45                                               | -0.18                                                                                  |
| 0.05421                                                  | 238.47                                                        | 0.003                                                                | 4.41                                               | -0.15                                                                                  |
| 0.07805                                                  | 238.37                                                        | 0.002                                                                | 4.38                                               | -0.15                                                                                  |
| 0.10062                                                  | 238.24                                                        | 0.002                                                                | 4.35                                               | -0.21                                                                                  |
| 0.16739                                                  | 238.07                                                        | 0.001                                                                | 4.28                                               | -0.12                                                                                  |
| 0.23096                                                  | 237.86                                                        | 0.001                                                                | 4.22                                               | -0.11                                                                                  |
| $C_8\text{BetC}_2\text{Cl}$ at $t = 25^\circ\text{C}$    |                                                               |                                                                      |                                                    |                                                                                        |
| 0.00010                                                  | 260.16                                                        | 2                                                                    | 4.47                                               | -3.39                                                                                  |
| 0.00020                                                  | 258.29                                                        | 2                                                                    | 4.47                                               | -1.70                                                                                  |
| 0.00050                                                  | 261.66                                                        | 0.5                                                                  | 4.47                                               | -0.98                                                                                  |
| 0.00098                                                  | 266.86                                                        | 0.2                                                                  | 4.47                                               | -0.75                                                                                  |
| 0.00194                                                  | 269.01                                                        | 0.07                                                                 | 4.47                                               | -0.62                                                                                  |
| 0.00504                                                  | 268.89                                                        | 0.03                                                                 | 4.46                                               | -0.35                                                                                  |
| 0.01006                                                  | 269.45                                                        | 0.01                                                                 | 4.46                                               | -0.25                                                                                  |
| 0.02005                                                  | 269.79                                                        | 0.01                                                                 | 4.44                                               | -0.19                                                                                  |
| 0.05038                                                  | 269.65                                                        | 0.002                                                                | 4.40                                               | -0.19                                                                                  |
| 0.07673                                                  | 269.55                                                        | 0.002                                                                | 4.37                                               | -0.14                                                                                  |
| 0.10098                                                  | 269.36                                                        | 0.001                                                                | 4.34                                               | -0.17                                                                                  |
| 0.12353                                                  | 269.50                                                        | 0.001                                                                | 4.31                                               | -0.10                                                                                  |
| 0.14823                                                  | 269.68                                                        | 0.001                                                                | 4.29                                               | -0.10                                                                                  |
| 0.17219                                                  | 269.43                                                        | 0.001                                                                | 4.26                                               | -0.08                                                                                  |
| 0.20934                                                  | 269.87                                                        | 0.001                                                                | 4.23                                               | -0.01                                                                                  |
| 0.29177                                                  | 269.90                                                        | 0.0004                                                               | 4.17                                               | 0.08                                                                                   |
| 0.35362                                                  | 270.65                                                        | 0.0003                                                               | 4.14                                               | 0.19                                                                                   |
| $C_{10}\text{BetC}_2\text{Cl}$ at $t = 25^\circ\text{C}$ |                                                               |                                                                      |                                                    |                                                                                        |
| 0.00008                                                  | 295.46                                                        | 2                                                                    | 4.48                                               | -2.68                                                                                  |

|         |        |         |      |       |
|---------|--------|---------|------|-------|
| 0.00022 | 299.77 | 0.4     | 4.48 | -0.84 |
| 0.00053 | 301.28 | 0.2     | 4.48 | -0.48 |
| 0.00094 | 301.32 | 0.1     | 4.48 | -0.41 |
| 0.00199 | 301.48 | 0.04    | 4.47 | -0.31 |
| 0.00528 | 301.56 | 0.02    | 4.47 | -0.24 |
| 0.00991 | 301.54 | 0.01    | 4.46 | -0.21 |
| 0.01964 | 301.62 | 0.004   | 4.45 | -0.18 |
| 0.04802 | 301.80 | 0.002   | 4.41 | -0.12 |
| 0.07519 | 303.60 | 0.001   | 4.39 | 0.15  |
| 0.10186 | 305.21 | 0.0004  | 4.38 | 0.39  |
| 0.14891 | 306.74 | 0.0002  | 4.37 | 0.62  |
| 0.18708 | 307.42 | 0.0001  | 4.36 | 0.72  |
| 0.31366 | 308.42 | 0.00004 | 4.33 | 0.88  |

$C_{12}BetC_2Cl$  at  $t = 25\text{ }^{\circ}C$  (1)

|         |        |        |      |       |
|---------|--------|--------|------|-------|
| 0.00012 | 312.41 | 2.1    | 4.48 | -5.05 |
| 0.00030 | 320.34 | 0.6    | 4.48 | -1.91 |
| 0.00077 | 327.77 | 0.1    | 4.48 | -0.80 |
| 0.00101 | 327.98 | 0.1    | 4.48 | -0.68 |
| 0.00222 | 331.96 | 0.03   | 4.47 | -0.33 |
| 0.00547 | 332.71 | 0.01   | 4.47 | -0.26 |
| 0.01033 | 333.04 | 0.005  | 4.46 | -0.19 |
| 0.01832 | 336.20 | 0.001  | 4.45 | 0.26  |
| 0.04753 | 340.75 | 0.001  | 4.45 | 0.92  |
| 0.07313 | 341.73 | 0.001  | 4.44 | 1.06  |
| 0.09783 | 342.14 | 0.001  | 4.44 | 1.12  |
| 0.17110 | 342.60 | 0.0004 | 4.42 | 1.20  |
| 0.25323 | 342.79 | 0.0003 | 4.41 | 1.23  |

$C_{12}BetC_2Cl$  at  $t = 15\text{ }^{\circ}C$

|         |        |        |      |       |
|---------|--------|--------|------|-------|
| 0.00007 | 225.93 | 15     | 4.65 | -3.84 |
| 0.00022 | 286.59 | 2      | 4.65 | -2.33 |
| 0.00045 | 302.95 | 0.8    | 4.65 | -1.84 |
| 0.00100 | 318.31 | 0.2    | 4.65 | -0.88 |
| 0.00241 | 324.18 | 0.05   | 4.65 | -0.79 |
| 0.00483 | 326.71 | 0.02   | 4.64 | -0.67 |
| 0.01012 | 328.01 | 0.01   | 4.63 | -0.60 |
| 0.01992 | 332.06 | 0.003  | 4.62 | -0.04 |
| 0.05141 | 337.27 | 0.0004 | 4.61 | 0.74  |
| 0.07442 | 338.23 | 0.0004 | 4.61 | 0.89  |
| 0.09959 | 338.74 | 0.0003 | 4.60 | 0.97  |
| 0.17494 | 339.38 | 0.0002 | 4.57 | 1.05  |
| 0.20120 | 339.46 | 0.0002 | 4.56 | 1.07  |
| 0.29168 | 339.64 | 0.0001 | 4.53 | 1.10  |

$C_{12}BetC_2Cl$  at  $t = 25\text{ }^{\circ}C$  (2)

|         |        |     |      |       |
|---------|--------|-----|------|-------|
| 0.00007 | 267.71 | 10  | 4.48 | -2.99 |
| 0.00022 | 305.21 | 2   | 4.48 | -1.13 |
| 0.00045 | 314.65 | 0.5 | 4.48 | -1.04 |

|         |        |        |      |       |
|---------|--------|--------|------|-------|
| 0.00100 | 325.93 | 0.1    | 4.48 | -0.36 |
| 0.00241 | 329.42 | 0.03   | 4.47 | -0.37 |
| 0.00483 | 331.32 | 0.01   | 4.47 | -0.24 |
| 0.01012 | 332.16 | 0.006  | 4.46 | -0.20 |
| 0.01992 | 336.54 | 0.001  | 4.45 | 0.35  |
| 0.05141 | 340.89 | 0.001  | 4.45 | 0.96  |
| 0.07442 | 341.70 | 0.001  | 4.44 | 1.07  |
| 0.09959 | 342.09 | 0.001  | 4.44 | 1.13  |
| 0.17494 | 342.64 | 0.0004 | 4.42 | 1.20  |
| 0.20120 | 342.70 | 0.0003 | 4.42 | 1.21  |
| 0.29168 | 342.84 | 0.0002 | 4.40 | 1.23  |

C<sub>12</sub>BetC<sub>2</sub>Cl at  $t = 35\text{ }^{\circ}\text{C}$

|         |        |        |      |       |
|---------|--------|--------|------|-------|
| 0.00007 | 310.10 | 4.0    | 4.36 | -1.95 |
| 0.00022 | 328.84 | 0.5    | 4.36 | -0.43 |
| 0.00045 | 331.23 | 0.2    | 4.36 | -0.38 |
| 0.00100 | 335.95 | 0.03   | 4.35 | -0.09 |
| 0.00241 | 336.28 | 0.01   | 4.35 | 0.00  |
| 0.00483 | 336.70 | 0.005  | 4.35 | 0.09  |
| 0.01012 | 337.26 | 0.002  | 4.34 | 0.14  |
| 0.01992 | 340.77 | 0.002  | 4.34 | 0.62  |
| 0.05141 | 344.35 | 0.001  | 4.34 | 1.13  |
| 0.07442 | 345.02 | 0.001  | 4.34 | 1.22  |
| 0.09959 | 345.35 | 0.001  | 4.33 | 1.27  |
| 0.17494 | 345.76 | 0.0005 | 4.33 | 1.33  |
| 0.20120 | 345.82 | 0.0004 | 4.33 | 1.34  |
| 0.29168 | 345.92 | 0.0003 | 4.32 | 1.36  |

C<sub>12</sub>BetC<sub>2</sub>Cl at  $t = 45\text{ }^{\circ}\text{C}$

|         |        |        |      |       |
|---------|--------|--------|------|-------|
| 0.00007 | 198.87 | 19     | 4.28 | -1.30 |
| 0.00022 | 316.28 | 1      | 4.28 | 0.24  |
| 0.00045 | 314.40 | 0.6    | 4.28 | 0.12  |
| 0.00100 | 329.11 | 0.1    | 4.28 | 0.25  |
| 0.00241 | 338.42 | 0.008  | 4.27 | 0.35  |
| 0.00483 | 339.69 | 0.003  | 4.27 | 0.41  |
| 0.01012 | 340.38 | 0.002  | 4.27 | 0.42  |
| 0.01992 | 343.80 | 0.003  | 4.26 | 0.81  |
| 0.05141 | 347.34 | 0.002  | 4.27 | 1.27  |
| 0.07442 | 347.99 | 0.001  | 4.27 | 1.35  |
| 0.09959 | 348.31 | 0.001  | 4.27 | 1.40  |
| 0.17494 | 348.72 | 0.0006 | 4.27 | 1.46  |
| 0.20120 | 348.77 | 0.0005 | 4.27 | 1.47  |
| 0.29168 | 348.87 | 0.0003 | 4.27 | 1.48  |



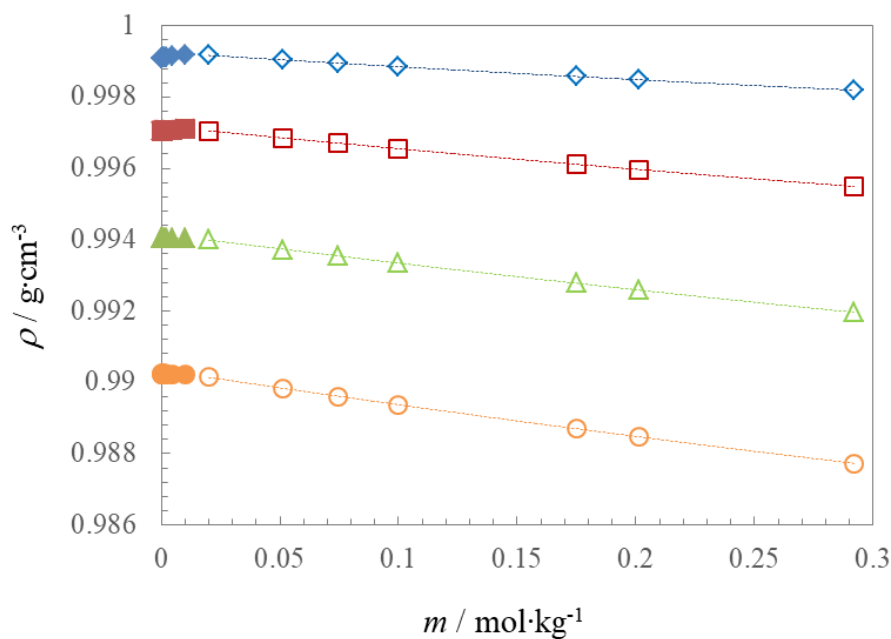

**Figure S21.** Density of aqueous solutions of C<sub>12</sub>BetC<sub>2</sub>Cl; experimental points: (♦, ♦)  $t = 15$  °C, (■, □)  $t = 25$  °C, (▲, △)  $t = 35$  °C, (●, ○)  $t = 45$  °C; filled points – before CMC, empty points – after CMC; lines – 1<sup>st</sup> or 2<sup>nd</sup> order polynomials (Table S3 )

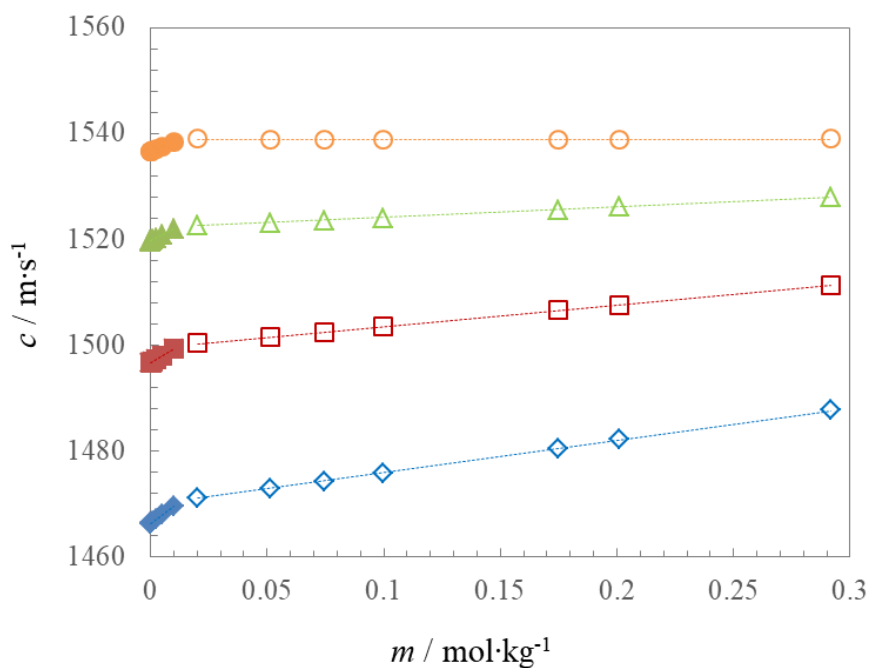

**Figure S22.** Speed of sound in aqueous solutions of C<sub>12</sub>BetC<sub>2</sub>Cl; experimental points: (♦, ♦)  $t = 15$  °C, (■, □)  $t = 25$  °C, (▲, △)  $t = 35$  °C, (●, ○)  $t = 45$  °C; filled points – before CMC, empty points – after CMC; lines – 1<sup>st</sup> order polynomials (Table S3 )

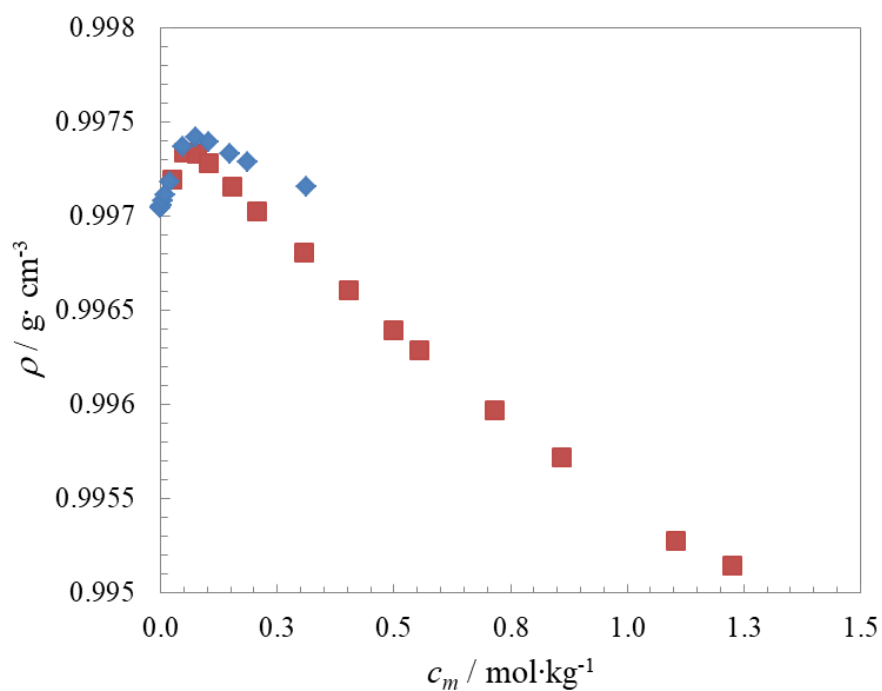

**Figure S23.** Comparison of density of aqueous solutions of  $C_{10}\text{Bet}C_2\text{Cl}$  at 25 °C; experimental points: (♦) this work, (■) from Ref. 22

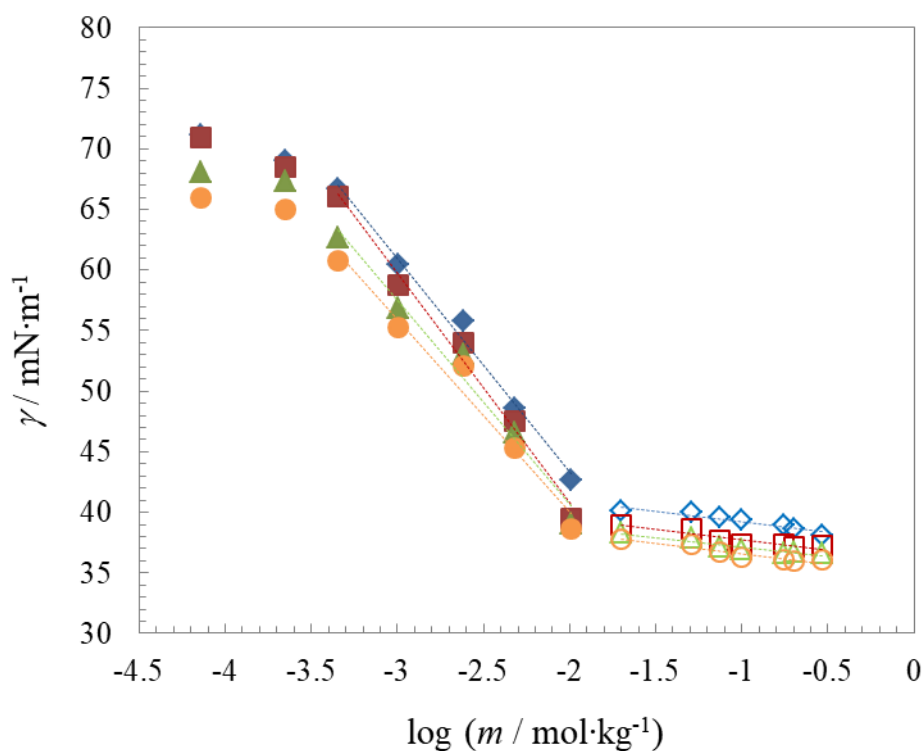

**Figure S24.** Surface tension of aqueous solutions of  $C_{12}\text{Bet}C_2\text{Cl}$ ; experimental points: (♦, ◇)  $t = 15$  °C, (■, □)  $t = 25$  °C, (▲, △)  $t = 35$  °C, (●, ○)  $t = 45$  °C; filled points – before CMC, empty points – after CMC; lines – 1<sup>st</sup> order polynomials (according Table S3)

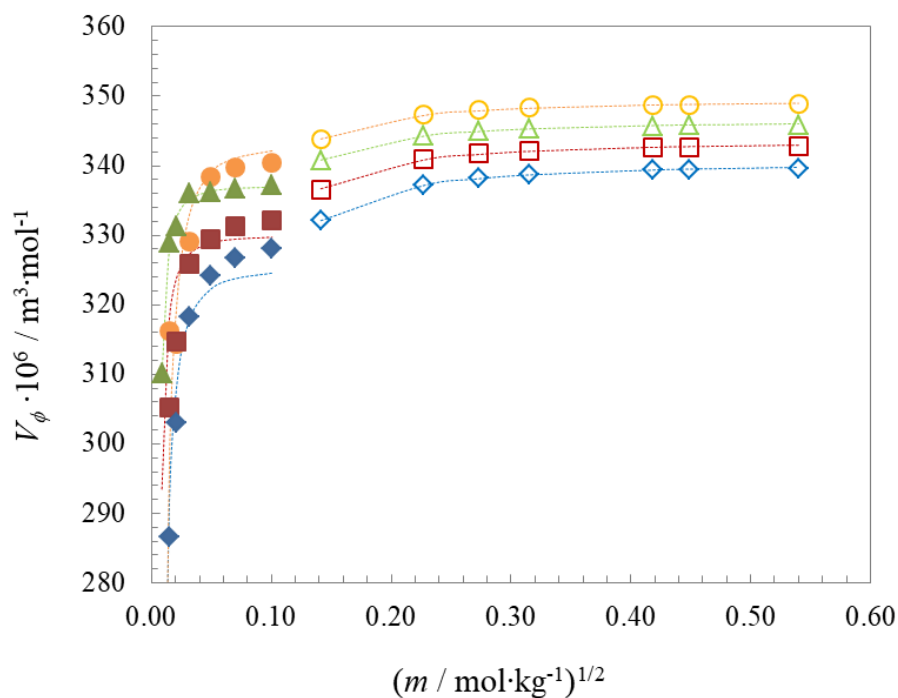

**Figure S25.** Apparent molar volume of  $\text{C}_{12}\text{BetC}_2\text{Cl}$  in aqueous solutions; points: ( $\blacklozenge$ ,  $\lozenge$ )  $t = 15$  °C, ( $\blacksquare$ ,  $\square$ )  $t = 25$  °C, ( $\blacktriangle$ ,  $\triangle$ )  $t = 35$  °C, ( $\bullet$ ,  $\circ$ )  $t = 45$  °C; filled points – before CMC, empty points – after CMC; lines – according Eq. (9)

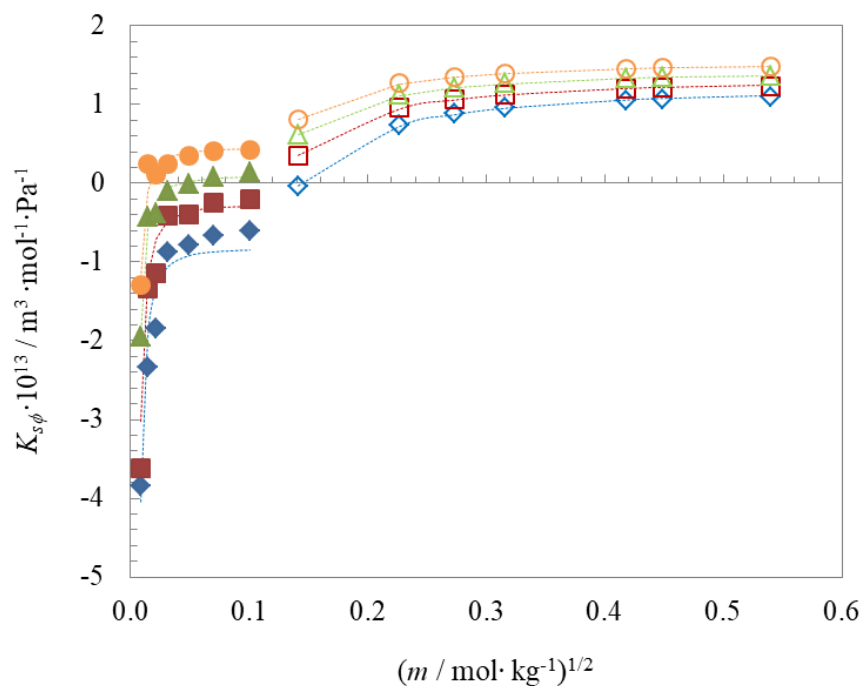

**Figure S26.** Apparent molar compressibility of  $\text{C}_{12}\text{BetC}_2\text{Cl}$  in aqueous solutions; points: ( $\blacklozenge$ ,  $\lozenge$ )  $t = 15$  °C, ( $\blacksquare$ ,  $\square$ )  $t = 25$  °C, ( $\blacktriangle$ ,  $\triangle$ )  $t = 35$  °C, ( $\bullet$ ,  $\circ$ )  $t = 45$  °C; filled points – before CMC, empty points – after CMC; lines – according Eq. (9)

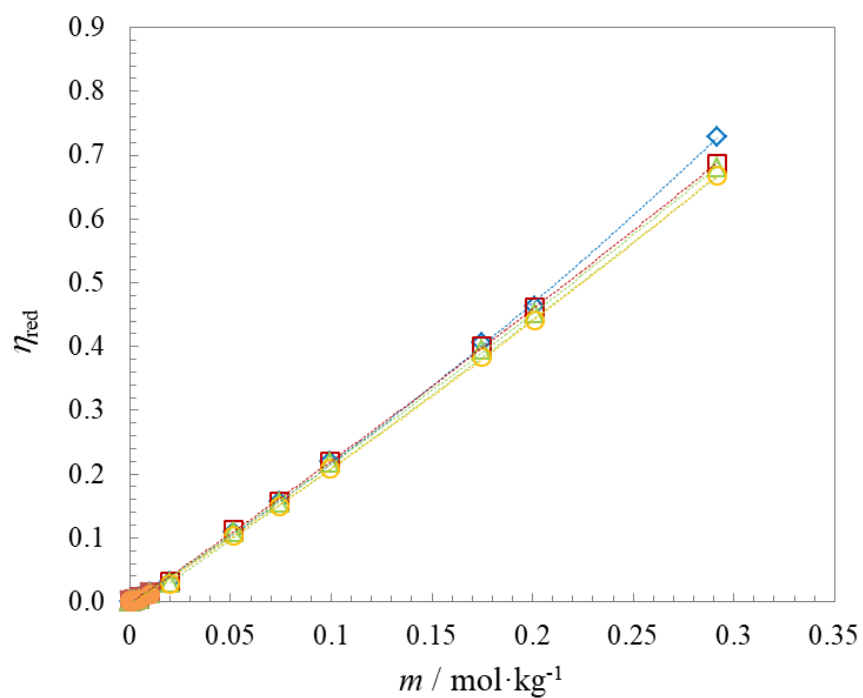

**Figure S27.** Reduced viscosity of aqueous solutions of  $\text{C}_{12}\text{BetC}_2\text{Cl}$ ; points: ( $\blacklozenge$ ,  $\lozenge$ )  $t = 15\text{ }^{\circ}\text{C}$ , ( $\blacksquare$ ,  $\square$ )  $t = 25\text{ }^{\circ}\text{C}$ , ( $\blacktriangle$ ,  $\triangle$ )  $t = 35\text{ }^{\circ}\text{C}$ , ( $\bullet$ ,  $\circ$ )  $t = 45\text{ }^{\circ}\text{C}$ ; filled points – before CMC, empty points – after CMC; lines – according Eq. (10)
